## Regulation of adult neurogenesis and neuronal differentiation by Neural Cell Adhesion Molecule 2 (NCAM2)

1 **Alba Ortega-Gascó**<sup>1,2,†</sup>, **Antoni Parcerisas**<sup>1,2,3,†</sup>, **Keiko Hino**<sup>4</sup>, **Vicente Herranz-Pérez**<sup>2,5,6</sup>,  
2 **Fausto Ulloa**<sup>1,2</sup>, **Alba Elias-Tersa**<sup>1,2</sup>, **Miquel Bosch**<sup>3</sup>, **José Manuel García-Verdugo**<sup>2,5</sup>,  
3 **Sergi Simó**<sup>4</sup>, **Lluís Pujadas**<sup>1,2,#,\*</sup> and **Eduardo Soriano**<sup>1,2,\*</sup>.

4 <sup>1</sup> Department of Cell Biology, Physiology, and Immunology; Institute of Neurosciences;  
5 University of Barcelona, Barcelona, Spain.

6 <sup>2</sup> Centro de Investigación Biomédica en Red Sobre Enfermedades Neurodegenerativas  
7 (CIBERNED), Madrid, Spain.

8 <sup>3</sup> Department of Basic Sciences, Universitat Internacional de Catalunya Barcelona, Sant  
9 Cugat del Vallès, Spain.

10 <sup>4</sup> Department of Cell Biology and Human Anatomy, University of California, Davis,  
11 California, USA.

12 <sup>5</sup> Laboratory of Comparative Neurobiology, Cavanilles Institute of Biodiversity and  
13 Evolutionary Biology, University of Valencia, Spain.

14 <sup>6</sup> Predepartamental Unit of Medicine, Faculty of Health Sciences, Universitat Jaume I,  
15 Castelló de la Plana, Spain.

16 #Present address: Faculty of Health Sciences and Welfare; Tissue Repair and  
17 Regeneration Laboratory (TR2Lab); University of Vic - Central University of Catalonia  
18 (UVic-UCC), Vic, Catalonia, Spain

19 <sup>†</sup> AO-G and AP contributed equally.

20 \* **Correspondence:** Professor Eduardo Soriano; [esoriano@ub.edu](mailto:esoriano@ub.edu), Lluís Pujadas;  
21 [lluis.pujadas@ub.edu](mailto:lluis.pujadas@ub.edu).

22 **Keywords:** cell adhesion molecules, adult neurogenesis, radial glial progenitor cells,  
23 corticogenesis, neuronal migration.

24 **ABSTRACT**

25 Adult neurogenesis persists in mammals in the neurogenic zones where newborn  
26 neurons are incorporated into existing neuronal circuits. Relevant molecular elements  
27 of the neurogenic niches include the family of Cell Adhesion Molecules (CAM), which  
28 participate in signal transduction and regulate radial glial progenitor's (RGPs) survival,  
29 division and differentiation. The Neural Cell Adhesion Molecule 2 (NCAM2) is expressed  
30 in brain development and in adult stages, and controls dendrite arborisation and  
31 synaptic formation and maintenance during development. Nevertheless, the role of  
32 NCAM2 in neurogenesis and lineage progression is not well understood. Here we  
33 analyse the functions of NCAM2 in the regulation of RGPs in adult neurogenesis in the  
34 dentate gyrus and during corticogenesis, by using different lentiviral-mediated genetic  
35 approaches to modulate its expression, both *in vivo* and *in vitro*. First, we characterized  
36 the expression of NCAM2 among the main actors of the neurogenic process revealing  
37 different levels of NCAM2 amid the progression of RGPs and the formation of juvenile  
38 neurons. Further, we show that overexpression of NCAM2 arrest infected cells in a RGP-  
39 like state, with characteristic morphological, immunocytochemical and electron  
40 microscopy features. In contrast, NCAM2 overexpression in embryonic cortical  
41 progenitors does not seems to alter cell fate, but causes transient migration deficits.  
42 These results reveal a differential role of NCAM2 in the regulation of adult and  
43 embryonic RGPs, and specifically, a significant implication of NCAM2 in the regulation  
44 and progression of RGPs during adult neurogenesis in the hippocampus.

## 45 INTRODUCTION

46 In mammals, active neurogenesis is preserved during adulthood in specific niches  
47 (Altman and Das 1965) by remaining radial glia progenitors (RGPs) in the subventricular  
48 zone (SVZ) of the lateral ventricles and in the subgranular zone (SGZ) of the hippocampal  
49 dentate gyrus (DG) (Gonçalves et al. 2016; Gage 2019; Ghosh 2019; Kumar et al. 2019;  
50 Denoth-Lippuner and Jessberger 2021). Adult neurogenesis recapitulates the  
51 developmental processes including proliferation, neuronal fate specification, migration,  
52 differentiation, synaptogenesis, and functional integration into preexistent circuits. It  
53 has been shown that neurogenesis in the adult brain plays an important role in memory  
54 and learning processes (Zhao et al. 2008; Bergmann et al. 2015; Kumar et al. 2019).

55 RGPs are located in specialized microenvironments or neurogenic niches where  
56 they are subjected to multiple signaling pathways that control its maintenance,  
57 proliferation and lineage progression. Those extrinsic and intrinsic cues include  
58 cytokines, trophic and growth factors, neurotransmitters, epigenetic mechanisms as  
59 well as physiological and pathological variables (Yao et al., 2016; Zhang & Sheng et al.,  
60 2015; Zhang, 2018; Zhao et al., 2008). Cell adhesion molecules (CAMs) have also been  
61 revealed as essential components of these microenvironments. They not only sustain  
62 the cytoarchitecture of the niche but also provides a link between the extracellular and  
63 the intracellular domains of RGPs participating in signal transduction. Therefore, CAMs  
64 are important for self-renewal and proliferation of RGPs, and for neuronal  
65 differentiation and migration (Bian 2013; Morante-Redolat and Porlan 2019).

66 The mammalian neural cell adhesion molecule (NCAM) family is composed of  
67 two members, NCAM1 and NCAM2, sharing a similar structure of 5 immunoglobulin  
68 domains and 2 fibronectin type III domains, but presenting different expression  
69 patterns, post-transcriptional modifications, and molecular interactions (Pébusque et al.  
70 1998; Makino and McLysaght 2010; Parcerisas, Ortega-gascó, et al. 2021). NCAM1 has  
71 been extensively studied and it has been described to play a role in neuronal migration,  
72 neurite development, synaptogenesis, and also in neurogenesis by regulating embryonic  
73 and adult neural stem cells (NSCs) (Kiselyov et al. 2003; Bonfanti 2006; Angata et al.  
74 2007a; Boutin et al. 2009; Francavilla et al. 2009). NCAM2 has two different isoforms:

75 NCAM2.1, with a cytoplasmatic domain, and NCAM2.2, which is GPI-anchored (Von  
76 Campenhausen et al. 1997; Alenius and Bohm 2003). In the central nervous system  
77 (CNS), the functions of NCAM2 have been mainly linked to the regulation of the  
78 formation and maintenance of axonal and dendritic biology compartments in the  
79 olfactory system (Alenius & Bohm, 2003; Kulahin & Walmod, 2010; Parcerisas, Ortega-  
80 Gascó, Pujadas, et al., 2021; Winther et al., 2012), and to the control of neural  
81 polarization, neurite outgrowth, dendrite development, and synapse formation and  
82 maintenance in the cortex and hippocampus through a complex panel of interactors  
83 (Leshchyns’Ka et al., 2015; Parcerisas et al., 2020; Sheng et al., 2015; Parcerisas, Ortega-  
84 gascó, et al., 2021). Interestingly, NCAM2 has been associated with different pathologies  
85 including Down syndrome, autism, and Alzheimer’s disease (JP et al., 2011;  
86 Leshchyns’Ka et al., 2015; Paoloni-Giacobino et al., 1997; Parr et al., 2006; Scholz et al.,  
87 2016; Winther et al., 2012). Regarding neurogenesis, Ncam2 has been detected in  
88 single-cell RNAseq studies that characterize the genetic profiles of qNSCs and their  
89 immediate progeny (Shin et al. 2015; Morizur et al. 2018). However, its role in RGP  
90 biology during neurogenesis remains unknown.

91 In the present study, we characterize the NCAM2 pattern of expression in the  
92 adult hippocampal neurogenic area and analyze the role of NCAM2 in the regulation of  
93 RGP biology during corticogenesis and in adulthood. To gain further insight into the  
94 importance of NCAM2 in the abovementioned processes, we used different biological  
95 and genetic tools including hippocampal viral injections, *in utero* electroporations and  
96 *in vitro* neurosphere cultures. Together, our results indicate that regulated NCAM2  
97 expression levels are crucial for proper adult neurogenesis in addition to its relevant role  
98 during brain development. Moreover, we suggest that NCAM2 participates in the fine  
99 regulation of quiescency in hippocampal RGPs, a mechanism that could help explaining  
100 some pathologies that have been linked to NCAM2 such as Alzheimer's disease which  
101 bear a complex phenotype including altered neurogenesis.

102

## 103 **MATERIALS AND METHODS**

### 104 **Animals**

105 All experimental procedures were carried out following the guidelines of the Committee  
106 for the Care of Research Animals of the University of Barcelona, in accordance with the  
107 directive of the Council of the European Community (2010/63 y 86/609/EEC) on animal  
108 experimentation. The experimental protocol was approved by the local University  
109 Committee (CEEA-UB, Comitè Ètic d'Experimentació Animal de la Universitat de  
110 Barcelona) and by the Catalan Government (Generalitat de Catalunya, Departament de  
111 Territori i Sostenibilitat).

### 112 **Antibodies and reagents**

113 The following commercial primary antibodies were used for immunohistochemistry:  
114 Anti-ChFP (ab167453, Abcam, 1:300); Anti-DCX (A8L1U, Cell Signaling, 1:500) Anti-GFP  
115 (A11122, Invitrogen, 1:2000); Anti-GFAP (Z033401, DAKO, 1:2000); Anti-MAP2  
116 (MA1406, Sigma, 1:2000); Anti-NCAM2 (AF778, R&D Systems, 1:750); Anti-Nestin  
117 (MAB353, Chemicon, 1:100), Anti-NeuN (MAB377, Merck, 1:1000); Anti-Sox2 (ab97959,  
118 Abcam, 1:500), Anti-Tbr2/EOMES (23345, Abcam, 1:100). Alexa Fluor fluorescent  
119 secondary antibodies were from Invitrogen. To counterstain nuclei, the tissue and cells  
120 were incubated in 2-(4-amidinophenyl)-1H -indole-6-carboxamide (DAPI, D-6564,  
121 Sigma, 1:1000). Biotinylated-secondary antibodies were from Vector Labs; streptavidin-  
122 biotinylated/HRP complex and ECL were from GE Healthcare. The HRP-labeled  
123 secondary antibodies used for western blot were from DAKO. Diaminobenzidine reagent  
124 (DAB) and Eukitt mounting media were from Sigma-Aldrich. Mowiol was from  
125 Calbiochem.

### 126 **Plasmids**

127 The plasmids ShNcam2, pCNcam2.1 and pCNcam2.2 used were described in Parcerisas  
128 et al, 2020. The cDNA of Ncam2.1 was amplified from the pCNcam2.1 with 5'-  
129 ACCATGAGCCTCCTCTCTCC-3' and 5'-CTGACCAAGGTGCTGAAACT-3'and cloned into  
130 pWPI (Plasmid #12254, Addgene) within PmeI site to obtain the pWPI-NCAM2.1. The  
131 cDNA of Ncam2.2 was amplified with 5'-ACCATGAGCCTCCTCTCTCC-3' and 5'-  
132 TCTCTGATCAGGGAGTACCA-3' and cloned into pWPI (Plasmid #12254, Addgene) within  
133 PmeI site to obtain the pWPI-NCAM2.2.

### 134 **Production and intrahippocampal injection of retrovirus**

135 The production and intrahippocampal injection of virus was performed as previously  
136 described (Parcerisas et al., 2020; Teixeira et al., 2012). Briefly, viral vectors were  
137 produced by transient transfection of HEK293T cells with calcium phosphate. Virus were  
138 concentrated by ultracentrifugation and resuspended in PBS.

139 For intrahippocampal injections, 8-week-old mice were anaesthetized with  
140 ketamine/xylazine mixture and placed on a heating blanket. They were positioned in a  
141 Kopf stereotaxic frame and a midline scalp incision was made. The scalp was reflected  
142 by hemostats to expose the skull, and bilateral burr holes were drilled. Viruses were  
143 then injected (1.5  $\mu$ l of viral stock solution per site) into the left and right dentate gyrus  
144 over 20 min using a 5  $\mu$ l Hamilton syringe. The micropipette was left in place for an  
145 additional 5 min. The coordinates used for the injections (in mm from Bregma and mm  
146 depth below the skull) were as follows: caudal 2.0, lateral 1.6, depth 2.2.

### 147 **Histological staining and electron microscopy**

148 Animals were anaesthetized and perfused for 20 min with PBS 4% paraformaldehyde  
149 (PFA). The brains were then removed, post-fixed overnight with PBS 4% PFA,  
150 cryoprotected with PBS-30% sucrose and frozen. Coronal sections (30  $\mu$ m) were  
151 obtained with a cryostat and immunohistofluorescence or immunohistochemistry were  
152 performed on free-floating sections. Samples were blocked with PBS containing 10%  
153 normal horse serum (NHS) and 0.2% gelatin; and incubated at 4°C overnight with PBS-  
154 5% NHS primary antibodies. For immunohistofluorescence, sequential incubation was  
155 carried out using a secondary antibody (Alexa Fluor, Invitrogen), and the sections were  
156 mounted with Mowiol (Calbiochem). The images were acquired with confocal  
157 microscopy (Spectral Confocal SP2 Microscope, Leica; Spectral Confocal SP8, Leica and  
158 Carl Zeiss LSM880, Zeiss). For immunohistochemistry, sequential incubation was carried  
159 out using biotinylated secondary antibodies (2 h at room temperature) and streptavidin-  
160 HRP (1:400; 2 h at room temperature) was performed in PBS-5% NGS; bound antibodies  
161 were visualized by reaction using DAB and H<sub>2</sub>O<sub>2</sub> as peroxidase substrates; the sections  
162 were dehydrated and mounted (Eukitt). Images were acquired with AF6000 microscope  
163 (Leica) and Olympus Bx61 microscope (Olympus).

164 For electron microscopy, sections were cryoprotected in 25% saccharose and  
165 freeze-thawed (3×) in methylbutane. The sections were then washed in 0.1 M phosphate  
166 buffer (PB; pH 7.4), blocked in 0.3% bovine serum albumin-C (BSA), and incubated with  
167 a primary chicken anti-GFP antibody (1:200; Aves Labs, Tigard, OR, USA) for 72 h at 4°C.  
168 The sections were washed in phosphate buffer (PB), blocked in 0.5% BSA and 0.1% cold-  
169 water fish-skin gelatin (Electron Microscopy Sciences, Hatfield, PA, USA) for 1 h, and  
170 subsequently incubated with a colloidal gold-conjugated secondary antibody (1:50; goat  
171 anti-chicken IgG gold UltraSmall, Electron Microscopy Sciences) for 24 h at room  
172 temperature. The sections were then washed in PB and 2% sodium acetate. Silver  
173 enhancement (Aurion R-gent Silver enhancer kit, Electron Microscopy Sciences) was  
174 performed following the manufacturer's directions, and the sections were washed again  
175 in 2% sodium acetate. To stabilize the silver particles, the samples were immersed in  
176 0.05% gold chloride (Sigma) for 10 min at 4°C, washed in sodium thiosulfate, washed in  
177 PB, and then postfixed in 2% glutaraldehyde for 30 min. The sections were incubated in  
178 1% osmium tetroxide and 7% glucose and then washed in deionized water.  
179 Subsequently, sections were partially dehydrated in 70% ethanol and incubated in 2%  
180 uranyl acetate in 70% ethanol in the dark for 2.5 h at 4°C. Brain slices were further  
181 dehydrated in ethanol followed by propylene oxide and infiltrated overnight in  
182 Durcupan ACM epoxy resin (Fluka, Sigma-Aldrich, St. Louis, USA). The following day,  
183 fresh resin was added, and the samples were cured for 72 h at 70°C. Following resin  
184 hardening, 1.5-µm semi-thin sections were selected under light microscopy based on  
185 their immunolabeling and detached from glass-slides by repeated freezing and thawing  
186 in liquid N<sub>2</sub>. Ultra-thin sections were obtained at 60–70 nm from selected semi-thin  
187 sections. Photomicrographs were obtained using a FEI Tecnai G<sup>2</sup> Spirit (FEI Europe,  
188 Eindhoven, Netherlands) using a digital camera Morada (Olympus Soft Image Solutions  
189 GmbH, Münster, Germany).

#### 190 ***In utero* electroporation**

191 *In utero* microinjection and electroporation were performed at E14.5 as described (Simó  
192 et al. 2010; Parcerisas et al. 2020b), using timed pregnant CD-1 mice (Charles River  
193 Laboratories). Briefly, DNA solutions were mixed in 10 mM Tris (pH 8.0) with 0.01% Fast  
194 Green. Needles for injection were pulled from Wiretrol II glass capillaries (Drummond

195 Scientific) and calibrated for 1  $\mu$ l injections. Forceps-type electrodes (Nepagene) with 5-  
196 mm pads were used for electroporation (five 50-msec pulses of 45 V at E14.5). Brains  
197 were collected at E19.5/P0 or P5, dissected, and successful electroporations identified  
198 by epifluorescence microscopy. Positive brains were fixed in 4% formalin in 0.1 M  
199 phosphate buffer saline (PBS) and cryoprotected in 30% sucrose/PBS overnight at 4°C.  
200 Brains were frozen in O.C.T compound before fourteen-micrometer-thick brain cross-  
201 sections were obtained with cryostat and placed on slides. Sections were antigen-  
202 retrieved by immersion of the slides in 0.01 M sodium citrate buffer, pH 6.0 at 95°C for  
203 20 min. Sections were blocked for 2 h with 10% normal goat serum, 10 mM glycine, and  
204 0.3% Triton X-100 in PBS at room temperature. Primary antibodies (anti-GFP and anti-  
205 ChFP) were incubated overnight at 4°C. Slides were washed four times for 10 min in  
206 0.1% Triton X-100/PBS. Secondary antibodies were added for 2 h at room  
207 temperature and the slides were washed as before and coverslipped with Prolong  
208 Gold anti-fade reagent (Molecular Probes). Most images were obtained with  
209 epifluorescent illumination and a 10 $\times$  objective (Leica 760 or AF6000). Positions of  
210 GFP- or ChFP-positive neurons were recorded from several sections per embryo. Data  
211 were collected from the lateral part of the anterior neocortex. For a BIN10  
212 quantification, the cortex was divided into 'BINs' as follows: the distance from the pial  
213 surface to the bottom of the SVZ was measured and divided into 10 equal-sized BINs.  
214 The percentage of GFP- or ChFP-labeled neurons in each BIN for each embryo was  
215 then calculated. Graphs plot the mean and standard error of % neurons in each BIN for  
216 the N embryos in a group.

### 217 **Neurospheres culture**

218 Neurospheres cultures were derived from 7-8 postnatal day (P7-P8) mice following the  
219 modified protocol described by Walker & Kempermann, 2014. Briefly, the SVZ of the  
220 lateral ventricles and the SGZ of the hippocampus were dissected in PBS. After trypsin  
221 (GIBCO) and DNase (Roche diagnostic) treatments, the tissue was dissociated with  
222 gentle sweeping. Cells were counted and plated in non-adherent 24 well plates in  
223 Neurobasal medium containing 2% B27 supplement (GIBCO), penicillin/streptomycin  
224 (Life technologies) and Glutamax (Life technologies), 20 ng/ml EGF, 20 ng/ml bFGF and



225 2 µg/ml heparin. Cells were incubated at 37°C with 5% CO<sub>2</sub> and subcultured every 2-3  
226 days.

227 For the growth analysis, neurospheres from the SGZ were dissociated with  
228 trypsin and infected at passage 2 with viruses (pWPI, pWPI-NCAM2.1, pWPI- NCAM2.2,  
229 ShNcam2 or ShCnt). GFP positive cells were selected by flow cytometry (BD FACSAria  
230 Fusion), plated in non-adherent 24-well plates and analyze during 5 consecutive days.  
231 High content image acquisition was performed with an Automated Wide-field Olympus  
232 IX81 Microscope (Olympus Life Science Europe, Waltham, MA) and a 4x UPlan FL N  
233 objective. ScanR Acquisition software version 2.3.0.5 was used to automatically record  
234 adjacent fields of view taking 20 (5 x 4) z-stacks (8 slices with a z-step of 200 nm) per  
235 well, with 10% of overlap to enable automatic image stitching. Neurosphere size was  
236 quantified by means of 3 different Fiji macros. In brief, tailor-made macros were used  
237 to project each z-stack, to stitch these projections and to quantify the size of each  
238 neurosphere.

### 239 **Image analysis**

240 All images were processed and quantified using the ImageJ software (NIH).

### 241 **Statistical analysis**

242 Statistical analysis was carried out using the Prism 8 software. Significance between two  
243 experimental groups was analysed using the unpaired Student's *t*-test. Differences  
244 between groups in distribution of cells in corticogenesis were assessed by two-way  
245 ANOVA followed by Bonferroni's comparison *post hoc* test. To determine differences  
246 between more than two groups in the adult neurogenesis characterization experiments,  
247 one way ANOVA was used. Post-hoc comparisons were performed by Tukey's test and  
248 significance level was set at  $P > 0.05$ : \* $P < 0.05$ , \*\* $P < 0.01$ , and \*\*\* $P < 0.001$ . To determine  
249 differences between two groups, Student's *t*-test and significance level was set at  
250  $P > 0.05$ : \* $P < 0.05$ , \*\* $P < 0.01$ , and \*\*\* $P < 0.001$ . Statistical values are presented as mean ±  
251 standard error of the mean (SEM).

## 252 RESULTS

### 253 Differential expression pattern of NCAM2 in the dentate gyrus

254 Since cell adhesion molecules are important structural elements of the neurogenic  
255 niches we first characterize the expression of NCAM2 in the different populations of cells  
256 at the DG of P45 mice by immunofluorescence. Dentate RGPs undergo several  
257 morphological and electrophysiological changes while expressing different markers  
258 through the neurogenic process to finally give rise to mature neurons. To identify type I  
259 progenitors we used the GFAP/Sox2 or Nestin markers while Tbr2 was selected to mark  
260 type II proliferative progenitors (Kempermann et al., 2015). In addition, we detected  
261 neuroblasts or immature neurons with antibodies against DCX; and mature neurons  
262 labelling NeuN. As NCAM2 is a membrane protein, the general pattern of NCAM2  
263 staining show clear staining in the delineating cells bodies and the dendrites of neurons.  
264 Confocal microscopy analysis reveal strong NCAM2 signal in GFAP/Sox2 or Nestin  
265 positive cells with the typical morphology of type I progenitors (i.e: triangular cell body  
266 located in the SGZ and a unique dendrite extended into the molecular layer) (**Fig. 1A-B**).  
267 Contrariwise, images suggest that NCAM2 expression in Tbr2 positive cells is low,  
268 although it is difficult to determine the expression of NCAM2 and Tbr2 in the same cells  
269 due to the localization of both proteins (**Fig. 2C**). Among the DCX positive cells  
270 population, we found different phenotypes with differences in NCAM2 staining. While  
271 some DCX positive cells display faint or undetected NCAM2 staining, other cells present  
272 higher levels of the protein (**Supplementary Fig. 1A**). Lastly, mature granule cells that  
273 express NeuN also present NCAM2 labelling, as expected (**Supplementary Fig. 1B**).

274 Therefore, the characterization of the expression pattern of NCAM2 in the  
275 dentate gyrus of the hippocampus suggests a differential expression of the protein in  
276 the main actors of the neurogenic process: while both RGPs and mature neurons express  
277 appreciable NCAM2 staining the intermediate type II-III progenitors may have a  
278 minimum in NCAM2 expression.

279 **NCAM2 modulates adult neurogenesis in the hippocampus**

280 With the purpose to study the potential role of NCAM2 in adult neurogenesis, we  
281 modulate the expression of the NCAM2 protein in the hippocampal neurogenic region.  
282 We stereotaxically injected transduced the DG of 8 week-old mice with  
283 NCAM2.1/NCAM2.2-overexpressing or ShNCAM2-silencing lentiviruses, which bear  
284 preferential infectivity on progenitor cells or neuroblasts. We analyzed the transduced  
285 DGs 4 weeks after surgery. Mice injected with control viruses exhibited the  
286 characteristic morphology of dentate granule cells (i.e. round soma in the granule cell  
287 layer, and apical dendrites ramifying in the molecular layer and covered by dendritic  
288 spines) (**Fig. 2A**, first panel). Similar results were found in mice injected with ShNCAM2  
289 viruses, indicating that the downregulation of NCAM2 does not alter the formation,  
290 survival, or maturation of new adult-born neurons in the DG. (**Fig. 2A**, second panel).  
291 Conversely, we found that many cells infected with NCAM2.1 and NCAM2.2  
292 overexpressing viruses did not exhibit the typical morphology of maturing granule cells  
293 but a RGP-like phenotype (i.e. triangular cell bodies located in the inner GL, with a  
294 unique, short radial process spanning the GL and ramifying profusely in the inner  
295 molecular layer) (**Fig. 2A**, third and fourth panel). Some infected cells, however,  
296 resembled type II progenitors or neuroblasts (i.e. irregular soma with short processes  
297 oriented tangentially or rounded soma with a short apical dendrite oriented towards the  
298 molecular layer) or immature granule cells. Enrichment in RGP-like phenotype  
299 apparently was more prominent upon NCAM2.2-overexpression.

300 To further characterize the phenotype of NCAM2 overexpressing cells, we  
301 performed fine structure analysis of GFP-labelled cells, identified by GFP-immunogold  
302 electron microscopy (**Fig. 2B**). Confirming our optical microscopy results, most control  
303 infected cells at the injection site corresponded to dentate granule cells which were  
304 closely apposed in the granule layer (GL). These cells showed a typical round-shaped  
305 soma, most of it occupied by the nucleus, which displayed chromatin aggregates. The  
306 cytoplasm was comprised by a thin space with a few long cisternae of endoplasmic  
307 reticulum and abundant free ribosomes. Nevertheless, we also observed GFP-positive  
308 cells in the SGZ. Among them, we identified RGPs and type II cells or neuroblasts. As  
309 previously described (Seri et al. 2004), RGPs were recognized as cells with a large cell

310 body with a major radial process that penetrates the granular layer extending thin  
311 lateral processes between granule neurons. They present a round or triangular nucleus,  
312 electron lucent cytoplasm, irregular contour and intermediate filaments in their  
313 cytoplasm. On the other hand, type II cell (or neuroblast) features include a smooth  
314 contour, dark scant cytoplasm, abundant polyribosomes and a less developed  
315 endoplasmic reticulum than granule cells. Interestingly, NCAM2.1/NCAM2.2-  
316 overexpressing GFP-positive cells were mainly detected in the SGZ and, according to  
317 their fine structure, could be identified RGPs (**Fig. 2B**).

### 318 **Cell autonomous overexpression of NCAM2 retains adult-born DG cells in a RGP-like** 319 **phenotype**

320 To better understand the events triggered by the expression of NCAM2 isoforms,  
321 animals injected with control and NCAM2 overexpressing viruses were sacrificed at  
322 different time points including earlier stages (3 days, 1 week, 2 weeks and 4 weeks) (**Fig.**  
323 **3A**). As a starting point, animals were sacrificed 3 days after injection. Although the  
324 infection is not strictly restricted to progenitor cells, as expected, the majority of the  
325 infected cells exhibit a RGPs morphology 3 days post-injection in all the experimental  
326 conditions (Consiglio et al. 2004; Jandial et al. 2008) (**Fig. 3B**). Focusing on posterior  
327 time points, most cells infected with control vectors at 1 week post-injection showed a  
328 morphology typical of immature granule cells that appeared progressively more mature  
329 at 2 and 4 weeks post-injection. In contrast, the shapes of NCAM2.1- and NCAM2.2-  
330 overexpressing cells remained constant overtime, with most of the labeled cells  
331 exhibiting an RGP-like cell morphology, while others exhibited intermediate  
332 progenitors- or neuroblast-like phenotypes (**Fig. 3B**).

333 The phenotype of cells infected with the viral vectors was additionally  
334 characterized evaluating the expression of specific cell markers at the different time  
335 points analyzed. The triple immunostaining of GFP/Sox2/GFAP was used to determine  
336 the proportion of RGPs within the pool of infected cells (**Fig. 4A-B**). At 3 days after  
337 injection most of control-infected cells were Sox2/GFAP double positive (**Fig. 4C**).  
338 Similarly, also NCAM2.1- and NCAM2.2-infected cells were mostly positive for both  
339 markers at 3 days post infection (**Fig. 4C**). Analyzing the evolution of GFP-/Sox2-/GFAP-  
340 positive progenitors in the control conditions we observed a significant and progressive

341 decline in the number of progenitors over time (**Fig. 4C-D**). In contrast, in the animals  
342 infected with NCAM2.1 or NCAM2.2 overexpressing viruses, we noticed a much less  
343 marked decrease in the proportion of those progenitors along the time-course, thus  
344 suggesting an arrest of the cells in the progenitor stage (**Fig. 4C-D**). We confirmed that  
345 most NCAM2.1- and NCAM2.2-overexpressing cells morphologically characterized as  
346 neuronal progenitor cells expressed the neuronal progenitor markers GFAP and Sox2 at  
347 1 week after injection (**Fig. 4A,C**). Additionally, quantification of the percentage of  
348 GFP/Sox2/GFAP revealed a maintenance of high proportion of GFAP/Sox2 positive cells  
349 in both NCAM2.1 and NCAM2.2 overexpressing conditions also at 2 weeks and 4 weeks,  
350 being more pronounced in the case of NCAM2.2 isoform (**Fig. 4C**).

351 The impact of NCAM2 overexpression in the process of neurogenesis was  
352 complemented quantifying the number of DCX positive cells at 2 and 4 weeks after viral  
353 transduction (**Fig. 5A**). According to the expected evolution of the neurogenic events,  
354 we observed a high percentage of DCX positive cells at 2 weeks after injection followed  
355 by a decrease at 4 weeks (**Fig. 5C**). The above-mentioned decline is not detected when  
356 NCAM2.1 or NCAM2.2 are overexpressed and we found a persisting number of DCX  
357 positive cells from 2 to 4 weeks after transduction. Finally, the number of NeuN mature  
358 neurons 4 weeks post-injection was also analyzed (**Fig. 5B**). In agreement with the  
359 previous data, we found a trend to show reduced percentages of NeuN positive neurons  
360 in the overexpression conditions at 4 weeks post-induction, reaching statistically  
361 significance for the NCAM2.2 isoform compared to controls (**Fig. 5D**).

362 This time-course analysis suggests that the observations at 4 weeks post-  
363 injection time on overexpression of NCAM2 are not attributable to a de-differentiation  
364 of immature neurons, but rather to a temporarily arrest of the RGP-like phenotype in  
365 the SGZ that leads to a delay in the formation of new neurons.

### 366 **NCAM2 overexpression do not arrest embryonic RGPs**

367 Since our results point out to an important role of NCAM2 in the regulation of adult RGPs  
368 and NCAM1 is involved both in adult and embryonic neurogenesis (Angata et al. 2007b;  
369 Boutin et al. 2009), we next sought to study the potential role of NCAM2 in RGPs during  
370 embryonic stages. We performed *in utero* electroporation experiments using isoform-  
371 specific overexpressing vectors (i.e. NCAM2.1 and NCAM2.2). Embryos were  
372 electroporated at E15 (using GFP or ChFP as reporter genes) and brains were analysed  
373 at P0 and P5, by counting the distribution of electroporated neurons across cortical  
374 layers. Interestingly, we found a moderate non-significant of cells located in the  
375 neurogenic areas, VZ and the intermediate zone (IZ), in cortices electroporated with  
376 NCAM2 isoforms (**Fig. 6A**). However, we observed alterations in the migration of  
377 neurons when modulating NCAM2 expression. Our previous study (Parcerisas et al.,  
378 2020) showed that both NCAM2 isoforms are expressed in the developing cortex and  
379 that its expression is necessary for correct neuronal migration, since NCAM2 knock-  
380 down leads to neuronal mispositioning. In the present analysis, we observed that at P0,  
381 most E15-born control neurons were present in the upper portion of the cortical plate  
382 and displayed a typical immature pyramidal neuron shape, with a main apical dendrite  
383 directed towards the marginal zone (**Fig. 6A-E**). In the case of E15-born NCAM2.2-  
384 overexpressing neurons, we observed an altered distribution with a significant reduction  
385 of neurons in the upper portion of the cortical plate (Bin 10) (**Fig. 6A-B**). E15-born  
386 NCAM2.1-overexpressing neurons also had a tendency to allocate below bin 10 (**Fig. 6A-**  
387 **B**). A synergistic effect was found when embryos were electroporated with both  
388 isoforms (NCAM2.1+NCAM2.2) simultaneously (**Fig. 6A-B**). Additionally, in contrast with  
389 NCAM2 depletion, NCAM2 overexpression apparently does not disrupt normal dendritic  
390 arborization at this stage.

391 In contrast, at P5, E15-electroporated neurons displayed a similar distribution in  
392 both for control and NCAM2-overexpressing conditions, with most neurons being  
393 located in the lower part of layer II-III (**Fig. 6C-D**). Our results suggest that NCAM2.1 and  
394 NCAM2.2 overexpression statistically not affect the proliferation, survival and  
395 differentiation of RGPs during embryonic stages but leads to transient migratory deficits.

### 396 **NCAM2 expression levels affect the growth of hippocampal-derived neurospheres**

397 The implications of NCAM2 in adult neurogenesis were further investigated *in vitro* using  
398 neurospheres. Hippocampal NSCs were obtained from P6/7 mice and grown as  
399 neurospheres in medium containing EGF and bFGF. Neurospheres were dissociated and  
400 cells were infected with Control, ShNCAM2, NCAM2.1, or NCAM2.2-overexpressing  
401 viruses all of them co-expressing GFP as a reporter gene. GFP-positive cells were  
402 selected by flow cytometry, plated in 24 well plates and analyzed by ScanR microscopy  
403 to measure the individual area of a total of 100-300 growing neurospheres per condition  
404 during 5 consecutive days (**Fig. 7A**). Whereas the downregulation of NCAM2 led to the  
405 formation of larger neurospheres, compared to controls, neurospheres derived from  
406 NCAM2.1- or NCAM2.2-overexpressing cells tended to be smaller (**Fig. 7B-C**). Focusing  
407 the analysis on day 3, we observed a different distribution of the neurospheres  
408 according to their area. The descriptive analysis of the frequency distributions shows  
409 that the mean and median values of the distribution are lower in the NCAM2.1 and  
410 NCAM2.2 overexpressing neurospheres than in controls; and higher in the ShNCAM2  
411 condition (**Fig. 7D-E**).

412         These findings further support the notion that NCAM2.1 and NCAM2.2 are  
413 involved in the regulation of NSCs proliferation.

## 414 **DISCUSSION**

415 The present work provides a deeper understanding on the relevant functions of NCAM2  
416 during embryonic development and adult neurogenesis. Our results suggests that  
417 NCAM2 levels regulate the RGP-to-immature neuron transition in the adult DG. In  
418 contrast, our data indicate that correct NCAM2 levels are not necessary for cortical  
419 neurogenesis, but relevant for cortical migration.

420 The injection of lentivirus to modulate the expression of NCAM2 in the  
421 progenitor cells of the SGZ in the hippocampus reveals a compelling role of NCAM2 in  
422 the regulation of neural progenitors. While the depletion of NCAM2 had minor effects,  
423 the overexpression of NCAM2 seems to arrest cells into an RGP-like phenotype and  
424 delay the formation of new granule cells, as characterized by morphology,  
425 immunohistochemical markers, and ultrastructure. However, when analyzing the  
426 effects of NCAM2 overexpression in the regulation of embryonic RGPs, we did not find  
427 clear evidences of any alterations in the survival, proliferation or differentiation of  
428 progenitor cells. We found that NCAM2 upregulation results in an early and transiently  
429 altered neuron distribution, suggesting a delay in their migration during cortical  
430 development. Our previous results also showed that the downregulation of NCAM2 led  
431 to an alteration of cortical migration leading to mislocalization of layer II-III fated  
432 neurons and altered morphology (Parcerisas et al., 2020). Neuronal migration is a key  
433 process in corticogenesis, the disruption of which is associated to many diseases  
434 including autism and schizophrenia (Hussman et al., 2011; Petit et al., 2015; Scholz et  
435 al., 2016). The mechanism underlying the effects of NCAM2 are not known. The  
436 interaction of NCAM2 with microtubule-associated proteins, such as MAP1B, that also  
437 participate in the regulation of neuronal migration has also been described (González-  
438 Billault et al., 2005; Kawauchi & Hoshino, 2008; Parcerisas et al., 2020; Parcerisas,  
439 Ortega-gascó, et al., 2021).

440 Focusing on the functions of NCAM2 in neurogenesis, our data suggest different  
441 roles of NCAM2 during adult and embryonic stages. In spite of the embryonic origin of  
442 adult RGPs, adult and embryonic progenitors are subject to distinct regulation (Urbán  
443 and Guillemot 2014; Berg et al. 2018; Daniel Berg et al. 2019). While embryonic RGPs  
444 have a highly proliferative rate necessary for the rapid growth of neural tissues (Urbán



445 et al., 2019; Urbán 2014); adult RGP are mostly found in a quiescent state, a mitotic-  
446 dormant phase with a low rate of metabolic activity but with a high sensitivity to  
447 environment signals (Urbán et al., 2019). The quiescence of RGP are actively maintained  
448 and the regulation of the transition from quiescence to activation is crucial to preserve  
449 a pool of RGP throughout life. Adult RGP are found in neurogenic niches, specialized  
450 microenvironments composed by different cellular types, ECM molecules, soluble  
451 factors and cell surface molecules (Bian, 2013). Neurogenic niches are crucial for the  
452 regulation of RGP properties and to maintain the quiescence/activation balance  
453 (Llorens-Bobadilla and Martin-Villalba, 2017; Basak et al., 2018; Kalamakis et al., 2019)  
454 as they convey the different physiological stimuli (Fabel and Kempermann 2008; Wang  
455 et al. 2011; N and F 2014; Ding et al. 2020) that induce the activation of quiescent RGP.

456 Cell adhesion molecules are key elements of the neurogenic niches. They are  
457 important for sustaining the architecture of the niche but also participate in signal  
458 transduction regulating stem cells, survival, proliferation, migration or differentiation.  
459 As a matter of fact, different cell adhesion molecules such as cadherin/protocadherins,  
460 VCAM1, L1CAM or NCAM1 have been identified playing a distinct role in the neurogenic  
461 niches (K. Angata et al., 2007; Bian, 2013; Boldrini et al., 2018; Bonfanti, 2006; Dihné et  
462 al., 2003; Karpowicz et al., 2009; Marthiens et al., 2010; Morante-Redolat & Porlan,  
463 2019; Morizur et al., 2018; Shin et al., 2015). Specifically, it has been described that cell  
464 adhesion molecules could be important regulators of the quiescence/activation balance.  
465 The genetic profiles of RGP showed an enriched expression of genes involved in cell-  
466 microenvironment interaction and cell-cell adhesion, and genes linked to cell membrane  
467 (Artegiani et al., 2017; Basak et al., 2018; Ding et al., 2020; Dulken et al., 2017;  
468 Hochgerner et al., 2018; Llorens-Bobadilla et al., 2015; Morizur et al., 2018; Shin et al.,  
469 2015). Upon activation, RGP proliferate and progress to rapid amplifying intermediate  
470 progenitors or type II cells. A decrease in the expression of some cell adhesion molecules  
471 seems to be necessary for the activation of quiescent RGP, their transition to  
472 intermediate progenitors and the proliferation of these progenitors (Morizur et al.,  
473 2018; Shin et al., 2015; Codega et al., 2014; Xie et al., 2020). A similar expression pattern  
474 has been presented in this study when immunodetecting NCAM2 in the SGZ  
475 populations. The proposed pattern of NCAM2 expression along dentate neurogenesis

476 cell types, supported by single cell RNA (Shin et al., 2015), confirms high NCAM2  
477 expression in type I progenitors and low levels in intermediate progenitors. In fact, the  
478 expression pattern of *Ncam2* gene during the early neurogenic events is similar to other  
479 genes related to the maintenance of stem cells quiescence (e.g: NPas3 or Aqp4) (Shin et  
480 al., 2015; Urbán et al., 2019) presenting high levels of expression in qNSCs that  
481 progressively decrease during their activation and transition to intermediate  
482 progenitors (Shin et al. 2015; Morizur et al. 2018) (**Supplementary Fig. 2, Fig. 9**). Once  
483 the precursor cell phase is completed, the levels of NCAM2 seem to experiment a  
484 progressive increase in the newborn DCX positive maturing neurons reaching high levels  
485 of expression in NeuN neurons. The increase of NCAM2 could be explained by the  
486 relevance of the protein for dendrite development, axon formation and synaptogenesis  
487 (Alenius & Bohm, 2003; Kulahin & Walmod, 2010; Winther et al., 2012, Parcerisas et al.,  
488 2020).

489         The levels of NCAM2 seems to be important for the regulation of RGP  
490 behaviour. In fact, our data show how changes in NCAM2 levels modifies the normal  
491 course of the neurogenic events. The upregulation of NCAM2 dramatically decrease the  
492 generation of newborn neurons. Diverse underlying mechanisms could explain these  
493 findings. The upregulation of NCAM2 could affect the survival of the newborn cells,  
494 induce the de-differentiation of developing neurons or either alter the differentiation of  
495 the newborn neurons. However, considering the expression pattern of the protein and  
496 the relevance of cell adhesion molecules in the regulation of RGPs (Codega et al. 2014;  
497 Morizur et al. 2018; Xie et al. 2020), our main hypothesis is that NCAM2 is important for  
498 the regulation and maintenance of RGPs quiescence. Considering that the  
499 overexpression of NCAM2 induces the retention of progenitor cells into a RGP state, we  
500 should expect that the downregulation of the protein promote the activation of RGPs to  
501 increase proliferation. In contrast, after inducing NCAM2 depletion in the hippocampus  
502 of injected mice, we did not detect an increase in the number of newly produced  
503 neurons. The underlying cause for this inconsistency might rest on the limitations  
504 imposed by the lack of uniformity in the infection of cells, preventing quantitative  
505 analyses of the number of new neurons generated. In order to overcome these  
506 limitations, we further investigated the effect of NCAM2 *in vitro* using a neurosphere  
507 assay. We observed that the downregulation of NCAM2 expression in progenitor cells *in*

508 *in vitro* increases the growth of neurospheres while overexpression of NCAM2 isoforms  
509 decreases the area of the neurospheres. The effects of NCAM2 in the proliferation of  
510 NSCs *in vitro* has previously been observed in progenitor cells that form the spinal cord  
511 (Deleyrolle et al. 2015) and supports the data obtained in the present study.

512 Taking these results together, we postulate that the regulation of NCAM2  
513 expression levels is necessary for the maintenance of RGP's quiescence and the  
514 activation of proliferation. High levels of NCAM2 arrest cells in a quiescent state while  
515 the downregulation of *ncam2* allows RGP's to exit quiescence and enter the cell cycle to  
516 proliferate and differentiate (**Fig. 9**). The temporary retention of cells in the progenitor  
517 stages would lead to a delay in the neurogenic events postponing the generation and  
518 maturation of granule cells although other explanations may contribute (e.g. changes in  
519 cell survival or differentiation to other cell types). Further research is needed to  
520 understand the mechanisms by which NCAM2 regulates RGP's quiescence, cell  
521 proliferation, and differentiation in adulthood. One hypothesis is that NCAM2 could  
522 interact with growth factor receptors such as the epidermal growth factor receptor  
523 (EGFR) or the fibroblast growth factor receptor (FGFR). Growth factors are important  
524 regulators of the activation of quiescent RGP's; for example, active RGP's in the SVZ could  
525 be identified by the expression of EGFR (Aguirre et al., 2010; Urbán et al., 2019). It has  
526 been described that NCAM2 binds to FGFR and EGFR (Deleyrolle et al. 2015; Rasmussen  
527 et al. 2018), and the interaction of other cell adhesion molecules, such as L1CAM or  
528 NCAM1, with FGFR has also been reported (Kulahin et al. 2008; Francavilla et al. 2009).  
529 Moreover, it has been shown that the overexpression of NCAM1 reduces baseline levels  
530 of EGFR, enhancing the EGF-induced receptor down-regulation, and that the depletion  
531 of NCAM2 increases the levels of the ErbB2 growth factor receptor (Povlsen et al. 2008;  
532 Deleyrolle et al. 2015). Another possibility is that NCAM2 expression could cause  
533 cytoskeletal rearrangements, which are known to influence the neurogenic process  
534 (Compagnucci et al., 2016; Parcerisas et al., 2020; Parcerisas, Ortega-gascó, et al., 2021).  
535 Neurogenic niches are complex microenvironments where RGP's receive and  
536 interact with multiple signals. Cell adhesion molecules are key elements for the  
537 transduction of the signals and the regulation of stem cells behavior. Our work provides  
538 evidence for a significant function of NCAM2 in the regulation of RGP's during adult

539 neurogenesis. Furthermore, we reveal the importance of NCAM2 expression in the  
540 regulation of neuronal migration and differentiation during the corticogenesis process  
541 in the embryonic development. Overall, the present study contribute to a better  
542 understanding of the implications of NCAM2 during neuronal development and adult  
543 plasticity.

544 **CONFLICT OF INTEREST**

545 The authors declare no competing financial interests.

546 **AUTHORS CONTRIBUTION**

547 E.S., L.P., and A.P. conceived and designed the study. A.O-G. and A.P. performed most  
548 of the experiments and analyzed data. K.H. and S.S. designed and performed *in*  
549 *utero* electroporation. V.H-P. and J.M.G-V. designed and produced the electron  
550 microscopy experiments and analysis. F.U. supervised the RGP characterization. A.E-T  
551 and M.B participate in some experiments. A.O-G., A.P., V.H.-P., L.P., and E.S. wrote the  
552 manuscript. All authors read and corrected the manuscript.

553 **FUNDING**

554 This work was supported by grants from the Spanish Ministry of Science, Innovation and  
555 Universities to V.H-P. (PCI2018-093062) and to E.S and L.P. (PID2019-106764RB-C21/  
556 AEI/ 10.13039/501100011033), from the Spanish Ministry of health (ISCIII-CIBERNED),  
557 from The Secretary of Universities and Research of the Department of Economy and  
558 Knowledge of the Generalitat de Catalunya to A.P, from the Valencian Council for  
559 Innovation, Universities, Science and Digital Society (PROMETEO/2019/075) to J.M.G-V,  
560 and from the National Institute of Health (NIH) (R01NS109176) to S.S..

561 **ACKNOWLEDGEMENTS**

562 We thank A. Lladó and S. Tosi (microscopy facility of the IRB-Barcelona) for FIJI macro  
563 design and technical assistance in ScanR acquisition; L. Bardia (microscopy facility of the  
564 IRB-Barcelona) for support and technical assistance; E. Coll and M. Calvo for technical  
565 assistance (microscopy facilities of the University of Barcelona). Marta Pérez for  
566 technical support in viral production (Universitat Internacional de Catalunya). The  
567 members of the Department of Cell Biology, Physiology and Immunology (University of  
568 Barcelona), specially J. Correas for cryostat support and Esther Verdaguer for valuable  
569 support; and members of the Soriano lab for experimental help and comments.

570 **ABBREVIATIONS**

571

|       |                                                                |
|-------|----------------------------------------------------------------|
| CAM   | Cell adhesion molecules                                        |
| CNS   | Central nervous system                                         |
| DAB   | Diaminobenzidine                                               |
| DAPI  | 2-(4-amidinophenyl)-1H -indole-6-carboxamide                   |
| DG    | Dentate gyrus                                                  |
| EGF   | Epidermal growth factor                                        |
| EGFR  | Epidermal growth factor receptor                               |
| FGF   | Fibroblast growth factor                                       |
| FGFR  | Fibroblast growth factor receptor                              |
| GFAP  | Glial Fibrillary acidic protein                                |
| GFP   | Green Fluorescent Protein                                      |
| GL    | Granule layer                                                  |
| GPI   | Glycosylphosphatidylinositol                                   |
| H     | Hilus                                                          |
| HRP   | Horseradish peroxidase                                         |
| IZ    | Intermediate zone                                              |
| L1CAM | L1 cell adhesion molecule                                      |
| MAP2  | Microtubule-associated protein 2                               |
| ML    | Molecular layer                                                |
| MTT   | (3-(4,5-dimethylthiazol-2-yl)-2,5- diphenyltetrazolium bromide |
| NCAM1 | Neural cell adhesion molecule 1                                |
| NCAM2 | Neural cell adhesion molecule 2                                |
| NGS   | Normal goat serum                                              |
| NHS   | Normal horse serum                                             |
| NSC   | Neural stem cell                                               |
| PB    | Phosphate buffer                                               |
| PBS   | Phosphate buffer saline                                        |
| PFA   | Paraformaldehyde                                               |
| RGP   | Radial glial progenitor                                        |
| SGZ   | Subgranular zone                                               |
| Sox2  | Sry-related HMG box transcription factor                       |
| SVZ   | Subventricular zone                                            |
| VCAM1 | Vascular cell adhesion molecule 1                              |

572

573 **REFERENCES**

- 574 Aguirre A, Rubio ME, Gallo V. 2010. Notch and EGFR pathway interaction regulates  
575 neural stem cell number and self-renewal. *Nature*. 467:323–327.
- 576 Alenius M, Bohm S. 2003. Differential function of RNCAM isoforms in precise target  
577 selection of olfactory sensory neurons. *Development*. 130:917–927.
- 578 Altman J, Das GD. 1965. Post-natal origin of microneurons in the rat brain. *Nature*.  
579 207:953–956.
- 580 Angata K, Huckaby V, Ranscht B, Terskikh A, Marth JD, Fukuda M. 2007. Polysialic Acid-  
581 Directed Migration and Differentiation of Neural Precursors Are Essential for  
582 Mouse Brain Development. *Mol Cell Biol*. 27:6659–6668.
- 583 Artegiani B, Lyubimova A, Muraro M, van Es JH, van Oudenaarden A, Clevers H. 2017. A  
584 Single-Cell RNA Sequencing Study Reveals Cellular and Molecular Dynamics of the  
585 Hippocampal Neurogenic Niche. *Cell Rep*. 21:3271–3284.
- 586 Basak O, Krieger TG, Muraro MJ, Wiebrands K, Stange DE, Frias-Aldeguer J, Rivron NC,  
587 van de Wetering M, van Es JH, van Oudenaarden A, Simons BD, Clevers H. 2018.  
588 Troy+ brain stem cells cycle through quiescence and regulate their number by  
589 sensing niche occupancy. *Proc Natl Acad Sci U S A*. 115:E610–E619.
- 590 Berg DA, Bond AM, Ming G, Song H. 2018. Radial glial cells in the adult dentate gyrus:  
591 what are they and where do they come from? *F1000Research*. 7.
- 592 Bergmann O, Spalding KL, Frisén J. 2015. Adult neurogenesis in humans. *Cold Spring*  
593 *Harb Perspect Med*. 5.
- 594 Bian S. 2013. Cell Adhesion Molecules in Neural Stem Cell and Stem Cell- Based Therapy  
595 for Neural Disorders. In: *Neural Stem Cells - New Perspectives*. InTech.
- 596 Boldrini M, Fulmore CA, Tartt AN, Simeon LR, Pavlova I, Poposka V, Rosoklija GB, Stankov  
597 A, Arango V, Dwork AJ, Hen R, Mann JJ. 2018. Human Hippocampal Neurogenesis  
598 Persists throughout Aging. *Cell Stem Cell*. 22:589-599.e5.
- 599 Bonfanti L. 2006. PSA-NCAM in mammalian structural plasticity and neurogenesis. *Prog*  
600 *Neurobiol*.
- 601 Boutin C, Schmitz B, Cremer H, Diestel S. 2009. NCAM expression induces neurogenesis  
602 in vivo. *Eur J Neurosci*. 30:1209–1218.
- 603 Codega P, Silva-Vargas V, Paul A, Maldonado-Soto AR, DeLeo AM, Pastrana E, Doetsch  
604 F. 2014. Prospective Identification and Purification of Quiescent Adult Neural Stem

- 605 Cells from Their In Vivo Niche. *Neuron*. 82:545–559.
- 606 Compagnucci C, Piemonte F, Sferra A, Piermarini E, Bertini E. 2016. The cytoskeletal  
607 arrangements necessary to neurogenesis. *Oncotarget*. 7:19414.
- 608 Consiglio A, Gritti A, Dolcetta D, Follenzi A, Bordignon C, Gage FH, Vescovi AL, Naldini L.  
609 2004. Robust in vivo gene transfer into adult mammalian neural stem cells by  
610 lentiviral vectors. *Proc Natl Acad Sci*. 101:14835–14840.
- 611 Daniel Berg AA, Su Y, Jimenez-Cyrus D, Ming G-L, Song H, Bond Correspondence AM,  
612 Berg DA, Patel A, Huang N, Morizet D, Lee S, Shah R, Rojas Ringeling F, Jain R,  
613 Epstein JA, Wu Q-F, Canzar S, Bond AM. 2019. A Common Embryonic Origin of Stem  
614 Cells Drives Developmental and Adult Neurogenesis Article A Common Embryonic  
615 Origin of Stem Cells Drives Developmental and Adult Neurogenesis. *Cell*. 177:654–  
616 668.
- 617 Deleyrolle L, Sabourin JC, Rothhut B, Fujita H, Guichet PO, Teigell M, Ripoll C, Chauvet N,  
618 Perrin F, Mamaeva D, Noda T, Mori K, Yoshihara Y, Hugnot JP. 2015. OCAM  
619 regulates embryonic spinal cord stem cell proliferation by modulating ErbB2  
620 receptor. *PLoS One*. 10:e0122337.
- 621 Denoth-Lippuner A, Jessberger S. 2021. Formation and integration of new neurons in  
622 the adult hippocampus. *Nat Rev Neurosci*. 1–14.
- 623 Dihn  M, Bernreuther C, Sibbe M, Paulus W, Schachner M. 2003. A new role for the cell  
624 adhesion molecule L1 in neural precursor cell proliferation, differentiation, and  
625 transmitter-specific subtype generation. *J Neurosci*. 23:6638–6650.
- 626 Ding WY, Huang J, Wang H. 2020. Waking up quiescent neural stem cells: Molecular  
627 mechanisms and implications in neurodevelopmental disorders. *PLoS Genet*. 16:1–  
628 26.
- 629 Dulken BW, Leeman DS, Boutet SC, Hebestreit K, Brunet A. 2017. Single-Cell  
630 Transcriptomic Analysis Defines Heterogeneity and Transcriptional Dynamics in the  
631 Adult Neural Stem Cell Lineage. *Cell Rep*. 18:777–790.
- 632 Fabel K, Kempermann G. 2008. Physical activity and the regulation of neurogenesis in  
633 the adult and aging brain. *NeuroMolecular Med*.
- 634 Francavilla C, Cattaneo P, Berezin V, Bock E, Ami D, De Marco A, Christofori G, Cavallaro  
635 U. 2009. The binding of NCAM to FGFR1 induces a specific cellular response  
636 mediated by receptor trafficking. *J Cell Biol*. 187:1101–1116.



- 637 Gage FH. 2019. Adult neurogenesis in mammals. *Science* (80- ). 364.
- 638 Ghosh HS. 2019. Adult Neurogenesis and the Promise of Adult Neural Stem Cells. *J Exp*  
639 *Neurosci.*
- 640 Gonçalves JT, Schafer ST, Gage FH. 2016. Adult Neurogenesis in the Hippocampus: From  
641 Stem Cells to Behavior. *Cell.*
- 642 González-Billault C, Del Río JA, Ureña JM, Jiménez-Mateos EM, Barallobre MJ, Pascual  
643 M, Pujadas L, Simó S, Torre A La, Gavin R, Wandosell F, Soriano E, Ávila J. 2005. A  
644 role of MAP1B in Reelin-dependent Neuronal Migration. *Cereb Cortex.* 15:1134–  
645 1145.
- 646 Hochgerner H, Zeisel A, Lönnerberg P, Linnarsson S. 2018. Conserved properties of  
647 dentate gyrus neurogenesis across postnatal development revealed by single-cell  
648 RNA sequencing. *Nat Neurosci.* 21:290–299.
- 649 Hussman JP, Chung RH, Griswold AJ, Jaworski JM, Salyakina D, Ma D, Konidari I,  
650 Whitehead PL, Vance JM, Martin ER, Cuccaro ML, Gilbert JR, Haines JL, Pericak-  
651 Vance MA. 2011. A noise-reduction GWAS analysis implicates altered regulation of  
652 neurite outgrowth and guidance in autism. *Mol Autism.* 2.
- 653 Jandial R, Singec I, Ames CP, Snyder EY. 2008. Genetic modification of neural stem cells.  
654 *Mol Ther.*
- 655 JP H, RH C, AJ G, JM J, D S, D M, I K, PL W, JM V, ER M, ML C, JR G, JL H, MA P-V. 2011. A  
656 noise-reduction GWAS analysis implicates altered regulation of neurite outgrowth  
657 and guidance in autism. *Mol Autism.* 2.
- 658 Karpowicz P, Willaime-Morawek S, Balenci L, Deveale B, Inoue T, Van Der Kooy D. 2009.  
659 E-Cadherin regulates neural stem cell self-renewal. *J Neurosci.* 29:3885–3896.
- 660 Kawauchi T, Hoshino M. 2008. Molecular Pathways Regulating Cytoskeletal Organization  
661 and Morphological Changes in Migrating Neurons. *Dev Neurosci.* 30:36–46.
- 662 Kempermann G, Song H, Gage FH. n.d. Neurogenesis in the Adult Hippocampus.
- 663 Kiselyov V V., Skladchikova G, Hinsby AM, Jensen PH, Kulahin N, Soroka V, Pedersen N,  
664 Tsetlin V, Poulsen FM, Berezin V, Bock E. 2003. Structural basis for a direct  
665 interaction between FGFR1 and NCAM and evidence for a regulatory role of ATP.  
666 *Structure.* 11:691–701.
- 667 Kulahin N, Li S, Hinsby A, Kiselyov V, Berezin V, Bock E. 2008. Fibronectin type III (FN3)  
668 modules of the neuronal cell adhesion molecule L1 interact directly with the

- 669 fibroblast growth factor (FGF) receptor. *Mol Cell Neurosci.* 37:528–536.
- 670 Kulahin N, Walmod PS. 2010. The neural cell adhesion molecule NCAM2/OCAM/RNCAM,  
671 a close relative to NCAM. *Adv Exp Med Biol.* 663:403–420.
- 672 Kumar A, Pareek V, Faiq MA, Ghosh SK, Kumari C. 2019. ADULT NEUROGENESIS IN  
673 HUMANS: A Review of Basic Concepts, History, Current Research, and Clinical  
674 Implications. *Innov Clin Neurosci.* 16:30.
- 675 Leshchyns'Ka I, Liew HT, Shepherd C, Halliday GM, Stevens CH, Ke YD, Ittner LM, Sytnyk  
676 V. 2015. A $\beta$ -dependent reduction of NCAM2-mediated synaptic adhesion  
677 contributes to synapse loss in Alzheimer's disease. *Nat Commun.* 6:8836.
- 678 Llorens-Bobadilla E, Zhao S, Baser A, Saiz-Castro G, Zwadlo K, Martin-Villalba A. 2015.  
679 Single-Cell Transcriptomics Reveals a Population of Dormant Neural Stem Cells that  
680 Become Activated upon Brain Injury. *Cell Stem Cell.* 17:329–340.
- 681 Makino T, McLysaght A. 2010. Ohnologs in the human genome are dosage balanced and  
682 frequently associated with disease. *Proc Natl Acad Sci U S A.* 107:9270–9274.
- 683 Marthiens V, Kazanis I, Moss L, Long K, Ffrench-Constant C. 2010. Adhesion molecules  
684 in the stem cell niche - More than just staying in shape? *J Cell Sci.*
- 685 Morante-Redolat JM, Porlan E. 2019. Neural stem cell regulation by adhesion molecules  
686 within the subependymal niche. *Front Cell Dev Biol.*
- 687 Morizur L, Chicheportiche A, Gauthier LR, Daynac M, Boussin FD, Mouthon MA. 2018.  
688 Distinct Molecular Signatures of Quiescent and Activated Adult Neural Stem Cells  
689 Reveal Specific Interactions with Their Microenvironment. *Stem Cell Reports.*  
690 11:565–577.
- 691 N U, F G. 2014. Neurogenesis in the embryonic and adult brain: same regulators,  
692 different roles. *Front Cell Neurosci.* 8.
- 693 Paoloni-Giacobino A, Chen H, Antonarakis SE. 1997. Cloning of a novel human neural cell  
694 adhesion molecule gene (NCAM2) that maps to chromosome region 21q21 and is  
695 potentially involved in Down syndrome. *Genomics.* 43:43–51.
- 696 Parcerisas A, Ortega-Gascó A, Pujadas L, Soriano E. 2021. The Hidden Side of NCAM  
697 Family: NCAM2, a Key Cytoskeleton Organization Molecule Regulating Multiple  
698 Neural Functions. *Int J Mol Sci* 2021, Vol 22, Page 10021. 22:10021.
- 699 Parcerisas A, Ortega-gascó A, Hernaiz-llorens M, Odena MA, Ulloa F, de Oliveira E, Bosch  
700 M, Pujadas L, Soriano E. 2021. New partners identified by mass spectrometry assay

- 701 reveal functions of NCAM2 in neural cytoskeleton organization. *Int J Mol Sci.* 22.
- 702 Parcerisas A, Pujadas L, Ortega-Gascó A, Perelló-Amorós B, Viais R, Hino K, Figueiro-Silva  
703 J, La Torre A, Trullás R, Simó S, Lüders J, Soriano E. 2020. NCAM2 Regulates  
704 Dendritic and Axonal Differentiation through the Cytoskeletal Proteins MAP2 and  
705 14-3-3. *Cereb Cortex.* 30:3781–3799.
- 706 Parr JR, Lamb JA, Bailey AJ, Monaco AP. 2006. Response to paper by Molloy et al.:  
707 Linkage on 21q and 7q in autism subset with regression [2]. *Mol Psychiatry.*
- 708 Pébusque MJ, Coulier F, Birnbaum D, Pontarotti P. 1998. Ancient large-scale genome  
709 duplications: Phylogenetic and linkage analyses shed light on chordate genome  
710 evolution. *Mol Biol Evol.* 15:1145–1159.
- 711 Petit F, Plessis G, Decamp M, Cuisset JM, Blyth M, Pendlebury M, Andrieux J. 2015.  
712 21q21 deletion involving NCAM2: Report of 3 cases with neurodevelopmental  
713 disorders. *Eur J Med Genet.* 58:44–46.
- 714 Povlsen GK, Berezin V, Bock E. 2008. Neural cell adhesion molecule-180-mediated  
715 homophilic binding induces epidermal growth factor receptor (EGFR) down-  
716 regulation and uncouples the inhibitory function of EGFR in neurite outgrowth. *J*  
717 *Neurochem.* 104:624–639.
- 718 Rasmussen KK, Falkesgaard MH, Winther M, Roed NK, Quistgaard CL, Teisen MN, Edslev  
719 SM, Petersen DL, Aljubouri A, Christensen C, Thulstrup PW, Lo Leggio L, Teilum K,  
720 Walmod PS. 2018. NCAM2 Fibronectin type-III domains form a rigid structure that  
721 binds and activates the Fibroblast Growth Factor Receptor. *Sci Rep.* 8.
- 722 Scholz C, Steinemann D, Mälzer M, Roy M, Arslan-Kirchner M, Illig T, Schmidtke J,  
723 Stuhmann M. 2016. NCAM2 deletion in a boy with macrocephaly and autism:  
724 Cause, association or predisposition? *Eur J Med Genet.* 59:493–498.
- 725 Seri B, García-Verdugo JM, Collado-Morente L, McEwen BS, Alvarez-Buylla A. 2004. Cell  
726 types, lineage, and architecture of the germinal zone in the adult dentate gyrus. *J*  
727 *Comp Neurol.* 478:359–378.
- 728 Sheng L, Leshchyn'ska I, Sytnyk V. 2015. Neural cell adhesion molecule 2 promotes the  
729 formation of filopodia and neurite branching by inducing submembrane increases  
730 in Ca<sup>2+</sup> levels. *J Neurosci.* 35:1739–1752.
- 731 Shin J, Berg DA, Zhu Y, Shin JY, Song J, Bonaguidi MA, Enikolopov G, Nauen DW, Christian  
732 KM, Ming GL, Song H. 2015. Single-Cell RNA-Seq with Waterfall Reveals Molecular

- 733 Cascades underlying Adult Neurogenesis. *Cell Stem Cell*. 17:360–372.
- 734 Shin J, Berg DA, Zhu Y, Shin JY, Song J, Bonaguidi MA, Enikolopov G, Nauen DW, Christian  
735 KM, Ming GL, Song H. 2015. Table S6. Single-cell gene expression table according  
736 to the pseudotime progression. In: Shin J, Berg DA, Zhu Y, Shin JY, Song J, Bonaguidi  
737 MA, Enikolopov G, Nauen DW, Christian KM, Ming GL, Song H. Single-Cell RNA-Seq  
738 with Waterfall Reveals Molecular Cascades underlying Adult Neurogenesis. *Cell*  
739 *Stem Cell*. 17:360–372.
- 740 Simó S, Jossin Y, Cooper JA. 2010. Cullin 5 regulates cortical layering by modulating the  
741 speed and duration of Dab1-dependent neuronal migration. *J Neurosci*. 30:5668–  
742 5676.
- 743 Teixeira CM, Kron MM, Masachs N, Zhang H, Lagace DC, Martinez A, Reillo I, Duan X,  
744 Bosch C, Pujadas L, Brunso L, Song H, Eisch AJ, Borrell V, Howell BW, Parent JM,  
745 Soriano E. 2012. Cell-autonomous inactivation of the reelin pathway impairs adult  
746 neurogenesis in the hippocampus. *J Neurosci*. 32:12051–12065.
- 747 Urbán N, Blomfield IM, Guillemot F. 2019. Quiescence of Adult Mammalian Neural Stem  
748 Cells: A Highly Regulated Rest. *Neuron*. 104:834–848.
- 749 Urbán N, Guillemot F. 2014. Neurogenesis in the embryonic and adult brain: same  
750 regulators, different roles. *Front Cell Neurosci*. 0:396.
- 751 Von Campenhausen H, Yoshihara Y, Mori K. 1997. OCAM reveals segregated  
752 mitral/tufted cell pathways in developing accessory olfactory bulb. *Neuroreport*.  
753 8:2607–2612.
- 754 Walker TL, Kempermann G. 2014. One mouse, two cultures: isolation and culture of  
755 adult neural stem cells from the two neurogenic zones of individual mice. *J Vis Exp*.  
756 e51225.
- 757 Wang YAZ, Plane JM, Jiang P, Zhou CJ, Deng W. 2011. Concise review: Quiescent and  
758 active states of endogenous adult neural stem cells: Identification and  
759 characterization. *Stem Cells*.
- 760 Winther M, Berezin V, Walmod PS. 2012. NCAM2/OCAM/RNCAM: Cell adhesion  
761 molecule with a role in neuronal compartmentalization. *Int J Biochem Cell Biol*.
- 762 Xie XP, Laks DR, Sun D, Poran A, Laughney AM, Wang Z, Sam J, Belenguer G, Fariñas I,  
763 Elemento O, Zhou X, Parada LF. 2020. High-resolution mouse subventricular zone  
764 stem-cell niche transcriptome reveals features of lineage, anatomy, and aging. *Proc*

- 765 Natl Acad Sci U S A. 117:31448–31458.
- 766 Yao B, Christian KM, He C, Jin P, Ming GL, Song H. 2016. Epigenetic mechanisms in  
767 neurogenesis. Nat Rev Neurosci.
- 768 Zhang L, Zhang X. 2018. Factors Regulating Neurogenesis in the Adult Dentate Gyrus. In:  
769 The Hippocampus - Plasticity and Functions. InTech.
- 770 Zhao C, Deng W, Gage FH. 2008. Mechanisms and Functional Implications of Adult  
771 Neurogenesis. Cell.
- 772

773 **FIGURE LEGENDS**

774 **Figure 1. Expression pattern of NCAM2 in the hippocampus progenitor cells.**

775 **A)** Immunohistochemical characterization of NCAM2 expression in GFAP/Sox2  
776 progenitor cells in P45 mice hippocampus. Arrowheads label NCAM2/GFAP/Sox2  
777 positive cells. **B)** NCAM2 expression in Nestin positive cells in the subgranular zone of  
778 P45 mice. Arrowheads label NCAM2/Nestin cells. **C)** Double immunostaining of NCAM2  
779 and Tbr2 at P45. Arrowheads label Tbr2 positive cells that present low NCAM2 signal.  
780 ML: molecular layer; GL: granule layer; H: hilus. Scale bar: A) 50  $\mu$ m, B,C) 20  $\mu$ m.

781 **Figure 2. NCAM2 overexpression modulates adult neurogenesis in the hippocampus.**

782 **A)** Representative images of GFP positive cells from the dentate gyrus of mice injected  
783 with control, ShNCAM2, or NCAM2 overexpressing viruses (NCAM2.1 and NCAM2.2) at  
784 4 weeks after injection. Control and ShNCAM2 positive cells show a granule cell  
785 morphology while RGP-like phenotype was observed in many cells infected with  
786 NCAM2.1 or NCAM2.2 overexpressing viruses. Scale bar: 50  $\mu$ m. **B)** GFP immunogold  
787 electron microscopy images of animals infected with control, NCAM2.1 OE or NCAM2.2  
788 OE viruses and sacrificed 4 weeks post-surgery. Control images show densely GFP-  
789 labelled granule cells and RGPs. In NCAM2.1 and NCAM2.2 OE mice, the number of  
790 labelled granule cells is dramatically decreased. Nevertheless, RGPs located in the SGZ  
791 still appear labelled with GFP. GC: granule cell; RGP: radial glia progenitor. Scale bar: 2  
792  $\mu$ m.

793 **Figure 4. Immunohistochemical characterization of NCAM2 overexpressing progenitor**  
794 **cells.**

795 **A)** Immunostaining of GFP positive cells with GFAP and Sox2 RGP markers from animals  
796 sacrificed 1 week post-injection. **B)** Immunostaining of GFP positive cells with GFAP and  
797 Sox2 RGP markers from animals sacrificed 4 weeks post-injection. **C-D)** Time course  
798 quantification of the GFP/Sox2/GFAP positive cells in mice injected with control,  
799 NCAM2.1 OE or NCAM2.2 OE viruses at 3 days, 1 week, 2 weeks and 4 weeks post-  
800 injection. N=2-3 animals, 5-10 slices per animal. Data are presented as mean  $\pm$  SEM; dots  
801 represent average values for individual animals (5-10 slices per animal, 20-50 cells per  
802 animal); N=2-3 animals per group at 3 days (control) 1, 2 and 4 weeks post-injection;

803 ANOVA, Tukey's comparison *post-hoc* test; \*  $P < 0.05$ , \*\*  $P < 0.01$ , \*\*\*  $P < 0.001$ , \*\*\*\*  
804  $P < 0.0001$ . In light gray bars, representation of NCAM2.1 and NCAM2.2 groups at 3 days  
805 post-injection (N=1 animals per group, qualitative study excluded from statistical  
806 analysis). In Fig. 4D, gray \* differences between Control and NCAM2.1; black \*  
807 differences between Control and NCAM2.2; • differences between NCAM2.1 and  
808 NCAM2.2. Arrowheads label GFP/Sox2/GFAP positive GFP-cells. ML: molecular layer; GL:  
809 granule layer; H: hilus. Scale bar: A, B) 20  $\mu\text{m}$ .

810 **Figure 5. Immunohistochemical characterization of NCAM2 overexpressing neurons.**

811 **A)** Immunostaining of GFP positive cells with DCX as a markers for neuroblasts (type III  
812 progenitors) and immature neurons from animals sacrificed 4 week post-injection. **B)**  
813 Immunostaining of GFP positive cells with NeuN as a markers for mature neurons from  
814 animals sacrificed 4 week post-injection. **C)** Quantifications of GFP/DCX positive cells in  
815 mice injected with control, NCAM2.1 OE or NCAM2.2 OE viruses at 2 and 4 weeks post-  
816 injection. N=2-4 animals per group, 5-6 slices (>50 cells per animal in the controls; 15-30  
817 cells per animal in the NCAM2 OE conditions). **D)** Quantification of GFP/NeuN positive  
818 cells in animals injected with control, NCAM2.1 OE or NCAM2.2 OE 4 weeks after  
819 transduction. N=4 animals per group, 5 slices per animal (>50 cells per animal). Data are  
820 presented as mean  $\pm$  SEM; differences between experimental groups ANOVA, Tukey's  
821 comparison *post-hoc* test; \*\*  $P < 0.01$ ; differences between time points Student's t-test;  
822 \*  $P < 0.05$ . Arrowheads label DCX or NeuN positive GFP-cells; arrows label NeuN negative  
823 GFP-cells. ML: molecular layer; GL: granule layer; H: hilus. Scale bar: A, B) 20  $\mu\text{m}$ .

824 **Figure 6. NCAM2 overexpression do not arrest embryonic RGP migration but affects neuronal**  
825 **migration.**

826 **A)** Representative images from the reporter gene GFP in electroporated neurons in  
827 cortical sections from P0 mice. E15-born neurons were electroporated with control (left  
828 panel) and overexpression vectors. Sections were counterstained with DAPI. **B)**  
829 Distribution of transfected cells within cortical layers was quantified at P0 by dividing  
830 cortical thickness in 10 BINs. Data are presented as the ratio of neurons with somas  
831 located in each BIN. Overexpression of NCAM2.2 isoform or simultaneous expression of  
832 both isoforms (NCAM2.1+NCAM2.2) induce a reduced proportion of cells in the upper  
833 BIN. N=5-8 animals electroporated with control or overexpression constructs; \*\*\*



834 P<0.001; two-way ANOVA, Bonferroni comparison *post hoc* test. **C)** Representative  
835 images from the reporter gene GFP in electroporated neurons in cortical sections from  
836 P5 mice. E15-born neurons were electroporated with control (left panel) and  
837 overexpression vectors for both isoforms (NCAM2.1+NCAM2.2; right panel). **D)**  
838 Distribution of transfected cells within cortical layers was quantified at P5 in 10 BINs.  
839 Data are presented as the ratio of neurons with somas located in each BIN. No  
840 differences were found within neuronal distribution between control and NCAM2-  
841 overexpressing neurons. N=6 electroporated animals with the constructs; two-ways  
842 ANOVA, Bonferroni comparison *post hoc* test. **E)** Higher magnification of representative  
843 images from transfected neurons at P0. Neurons show normal pyramidal neuronal  
844 morphology. CP, cortical plate; IZ, intermediate zone; MZ, marginal zone; SVZ,  
845 subventricular zone; I-VI, cortical layers. Scale bars: A,D) 50  $\mu\text{m}$ ; E) 10  $\mu\text{m}$ .

846 **Figure 7. NCAM2 expression levels affect the proliferation of NSCs grown as**  
847 **neurospheres.**

848 **A)** Scheme showing the protocol for the obtention of post-natal mouse neurospheres  
849 from the neurogenic niches. Progenitor cells were isolated and grown as neurospheres  
850 **A.1)** Neurospheres where infected with control, NCAM2 overexpressing or ShNCAM2  
851 viruses, selected by flow cytometry and plated in non-adherent plates. The area of the  
852 infected neurospheres was analysed by Scan-R microscopy for 5 consecutive days. **A.2)**  
853 Cells were plated in adherent coverslips, infected with control, NCAM2 overexpressing  
854 or ShNCAM2 viruses and maintained 5 days in differentiation conditions before fixation.  
855 **B)** Representative images of control, ShNCAM2, or NCAM2 overexpressing  
856 neurospheres after 3 days *in vitro*. **C)** Quantification of the time-course progress for the  
857 area of neurospheres for 5 consecutive days after sorting of infected cells. N= 100-300  
858 neurospheres per condition, 1 independent experiment. **D)** Comparison of the area of  
859 neurospheres at 3 days *in vitro*. **E)** Histograms of control, NCAM2.1 OE, NCAM2.2 OE and  
860 ShNCAM2 neurospheres distribution according to their area 3 days after FACS selection.  
861 Coloured bars label percentile 50. Data are presented as mean  $\pm$  SEM; Kruskal-Wallis  
862 test, \*\*\* P<0.001. Scale bar: B) 100  $\mu\text{m}$ .



863 **Figure 8. Model of RGPs regulation by NCAM2 expression levels in the hippocampus.**  
864 Schematic representation of the proposed model for NSC regulation by NCAM2  
865 expression. RGPs (Type 1 cells) are GFAP/Sox2/Nestin positive cells and are maintained  
866 in a quiescent state in the SGZ of the dentate gyrus. Upon activation, they generate Tbr2  
867 positive proliferating intermediate progenitors (Type 2 cells). Those transit-amplifying  
868 progenitors produce neuroblasts (Type 3 cells) that express DCX and differentiate into  
869 NeuN positive granule cells. New-born neurons mature and become functional neurons  
870 of the hippocampal circuits. This process is regulated by different intrinsic and extrinsic  
871 factors, such as growth factors. We postulate that the levels of cell adhesion molecules  
872 such as NCAM2 protein are crucial for the regulation of NSC quiescence, the activation  
873 of proliferation and for the proper neuronal differentiation and maturation in later  
874 stages (Shin et al. 2015; Morizur et al. 2018; Parcerisas et al. 2020).

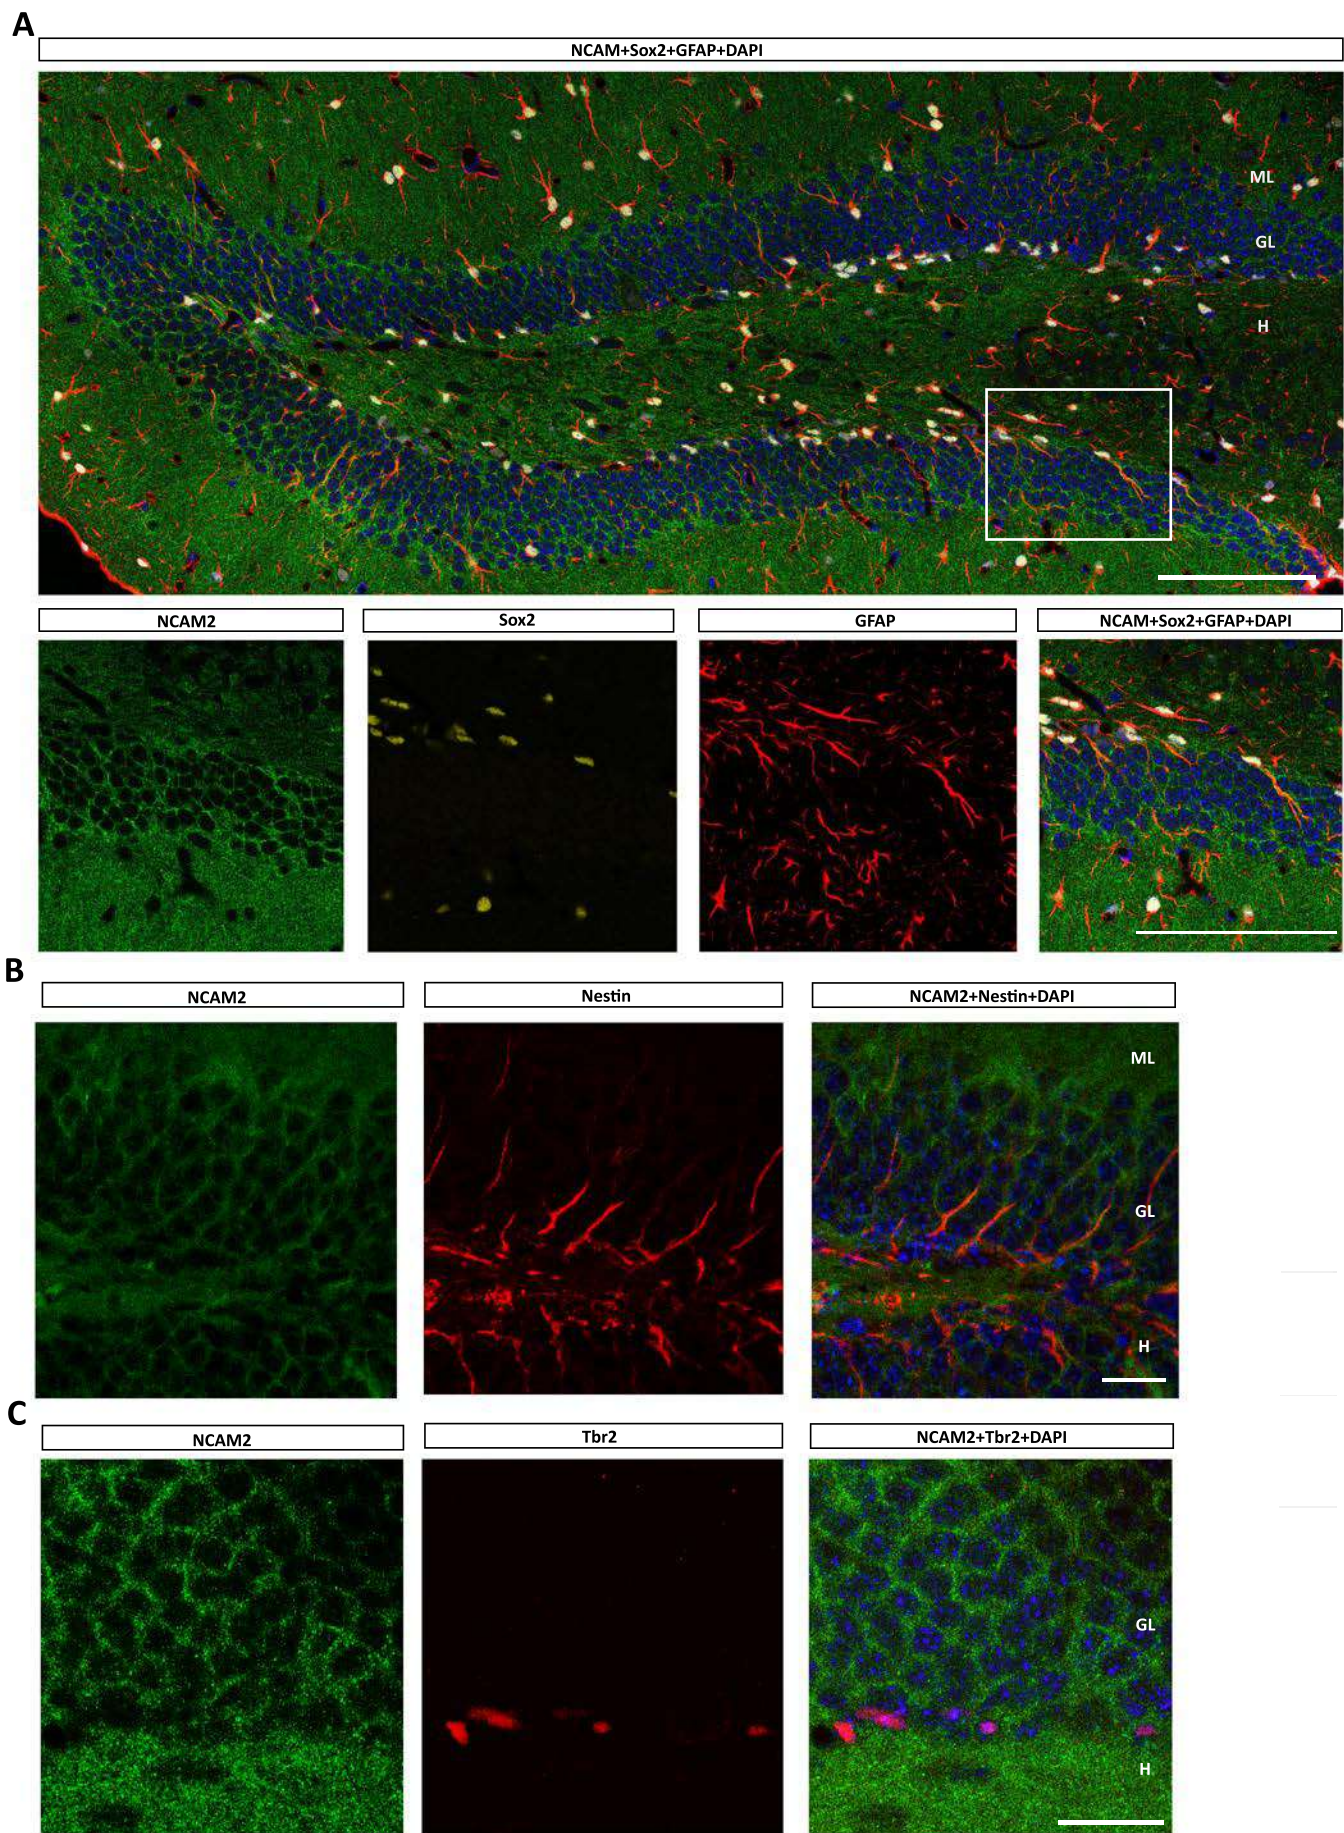

Figure 1



**A**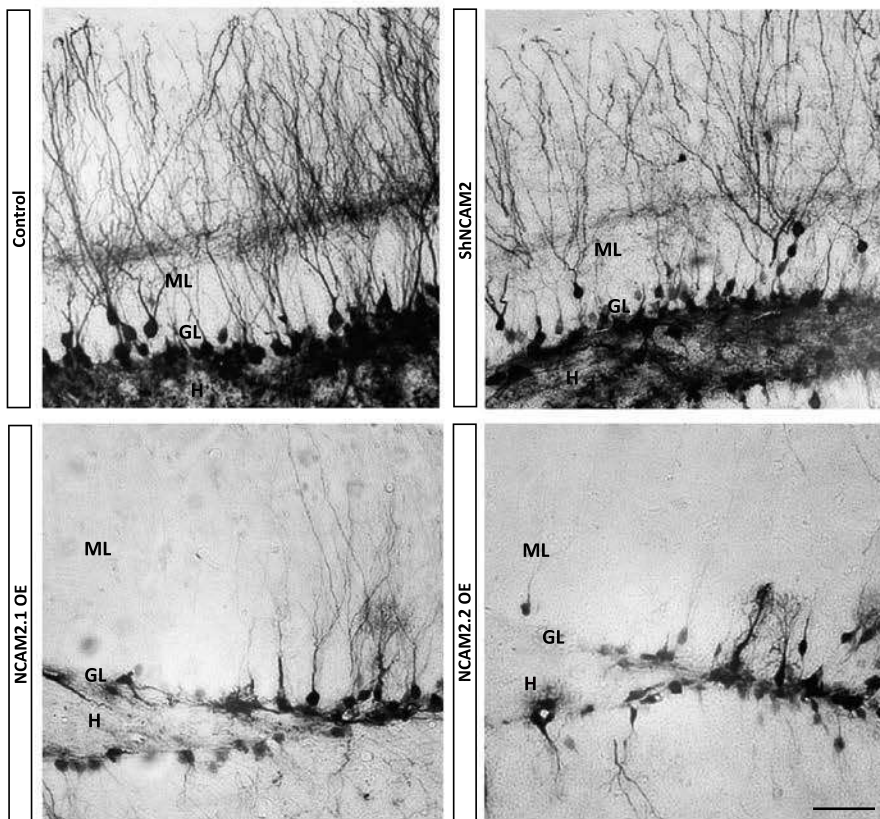**B**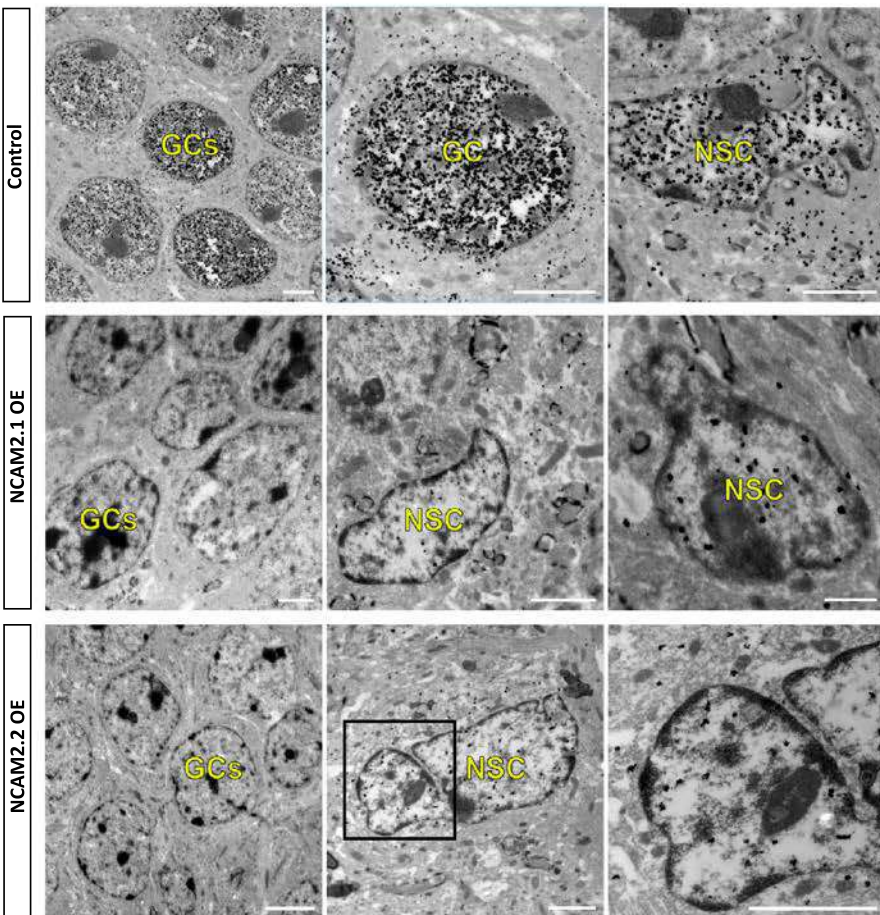

Figure 2

**A**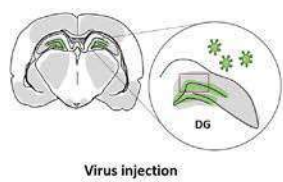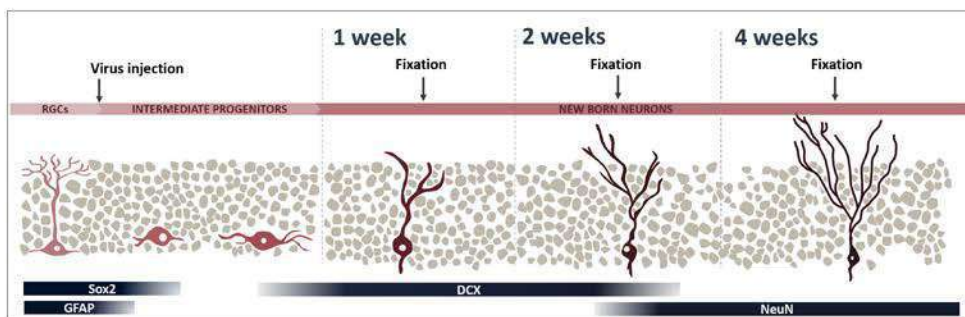**B**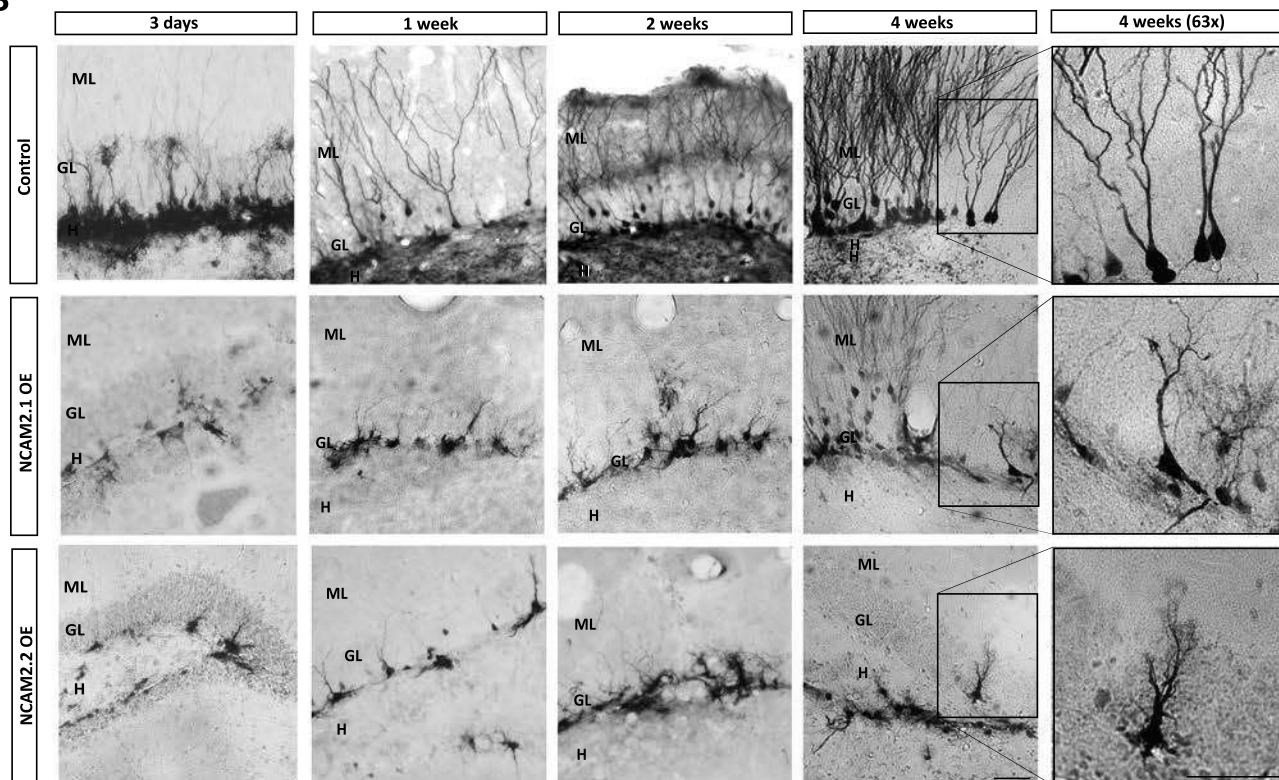**Figure 3**



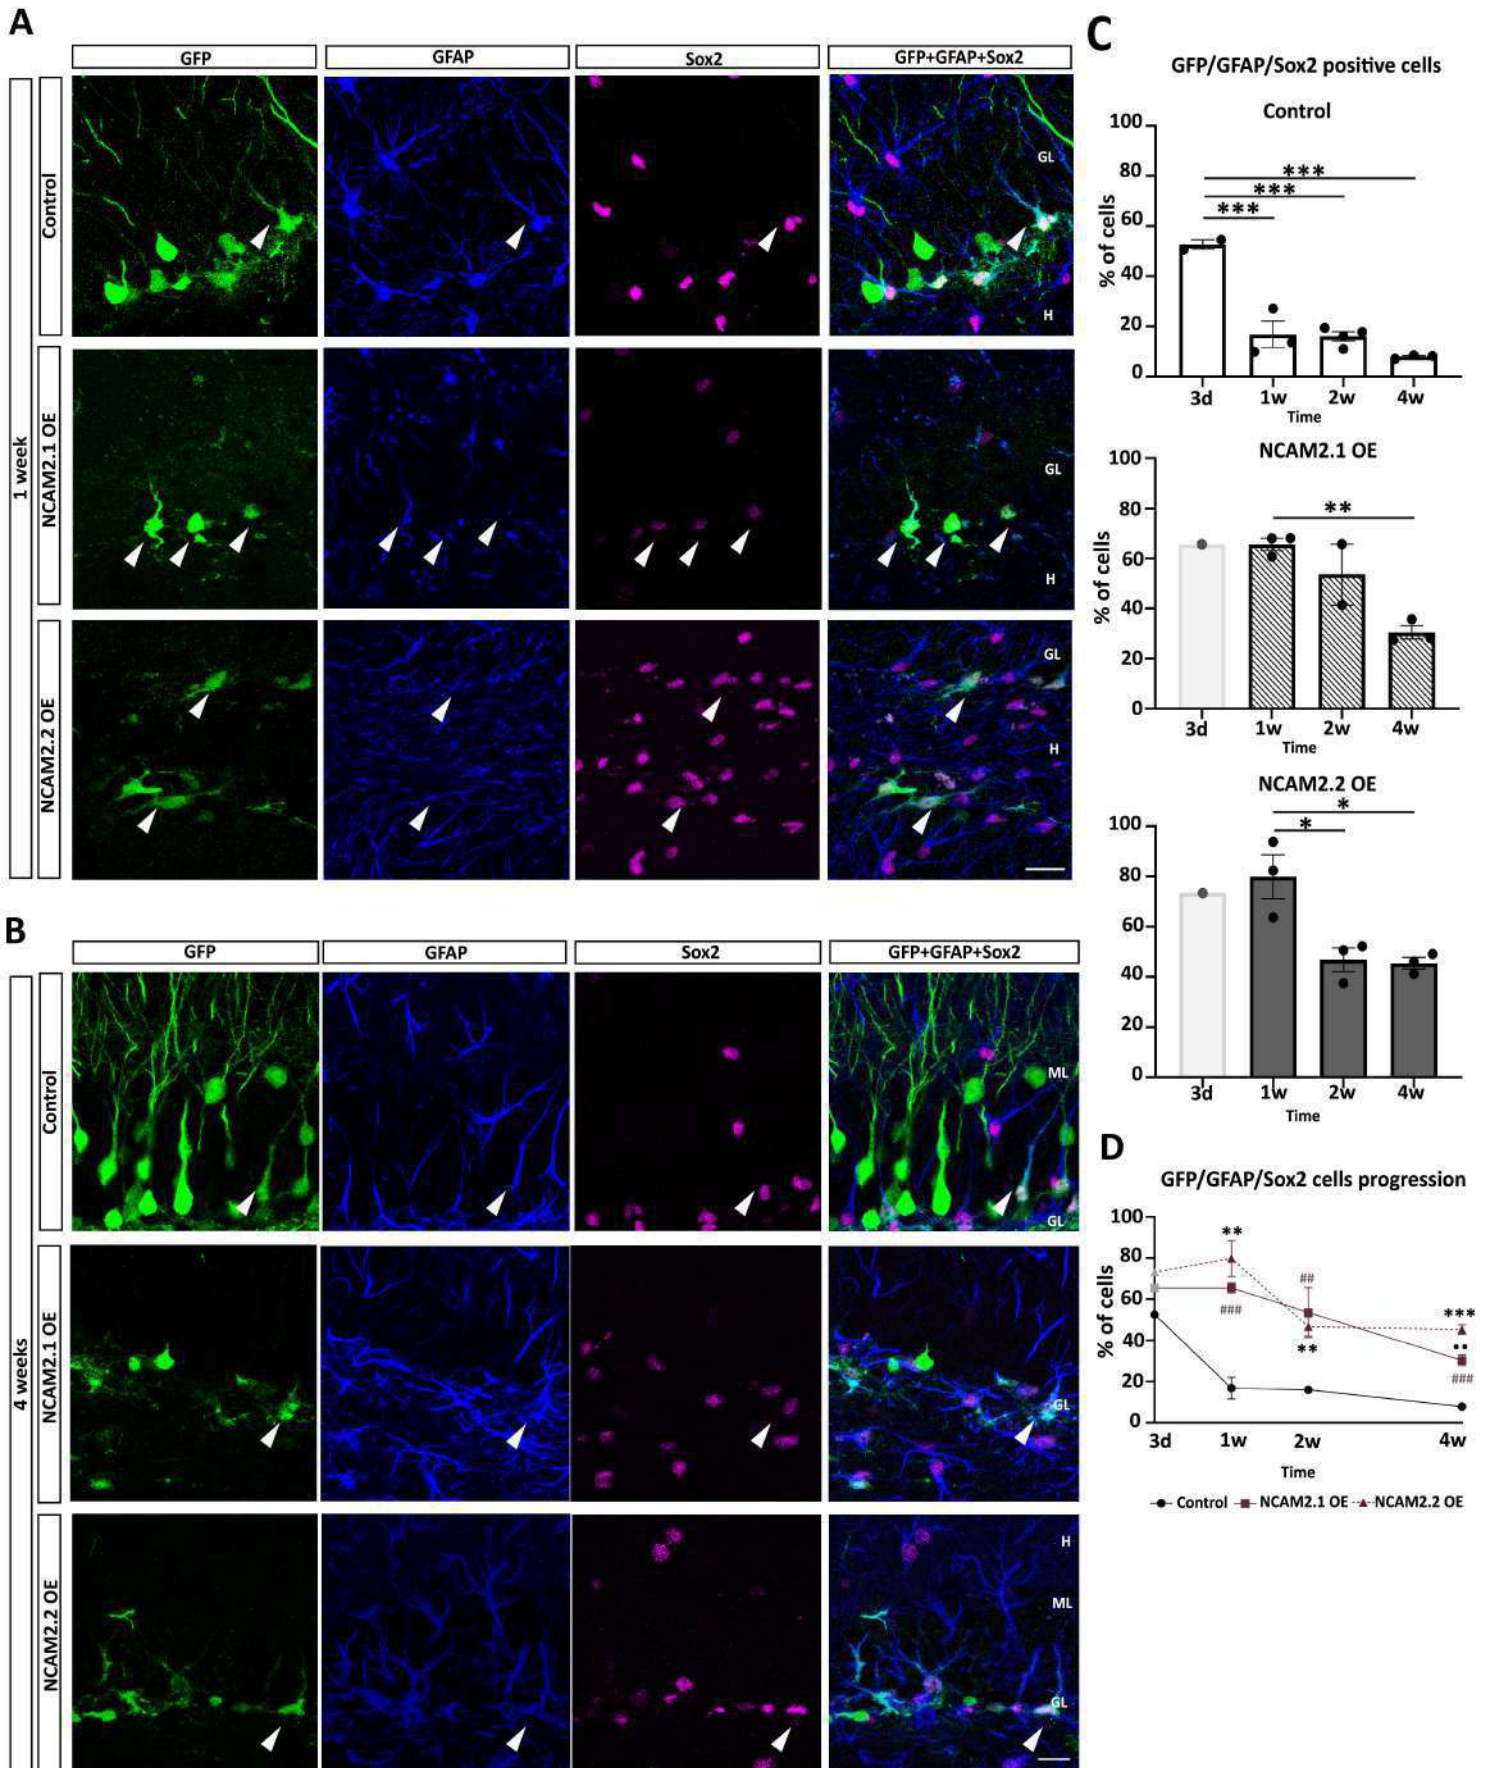

Figure 4

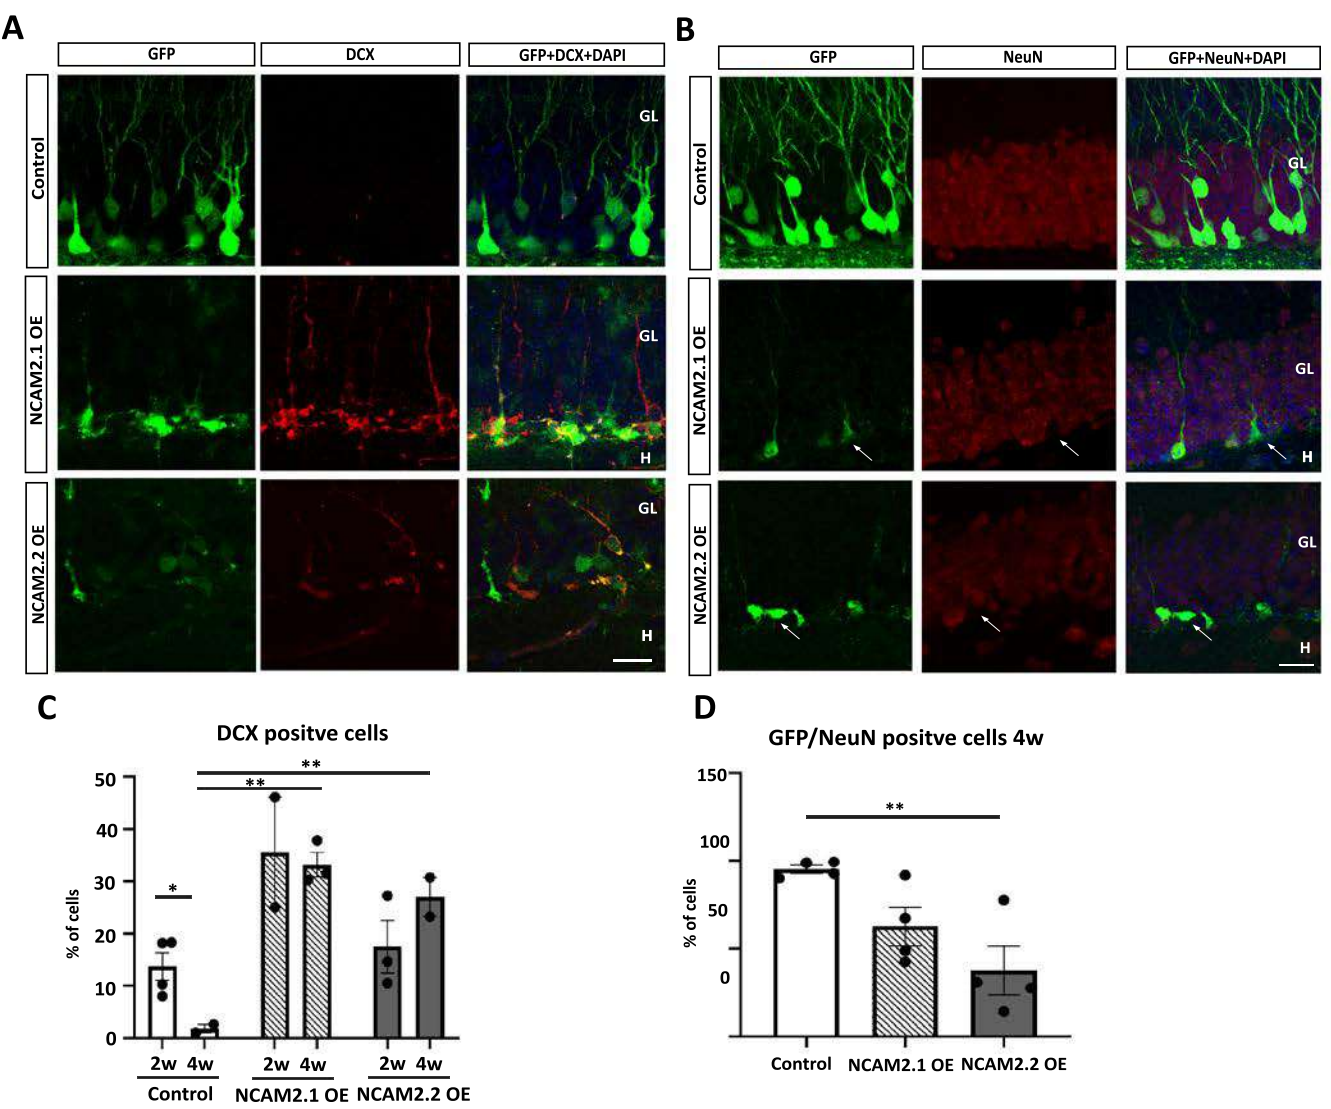

Figure 5



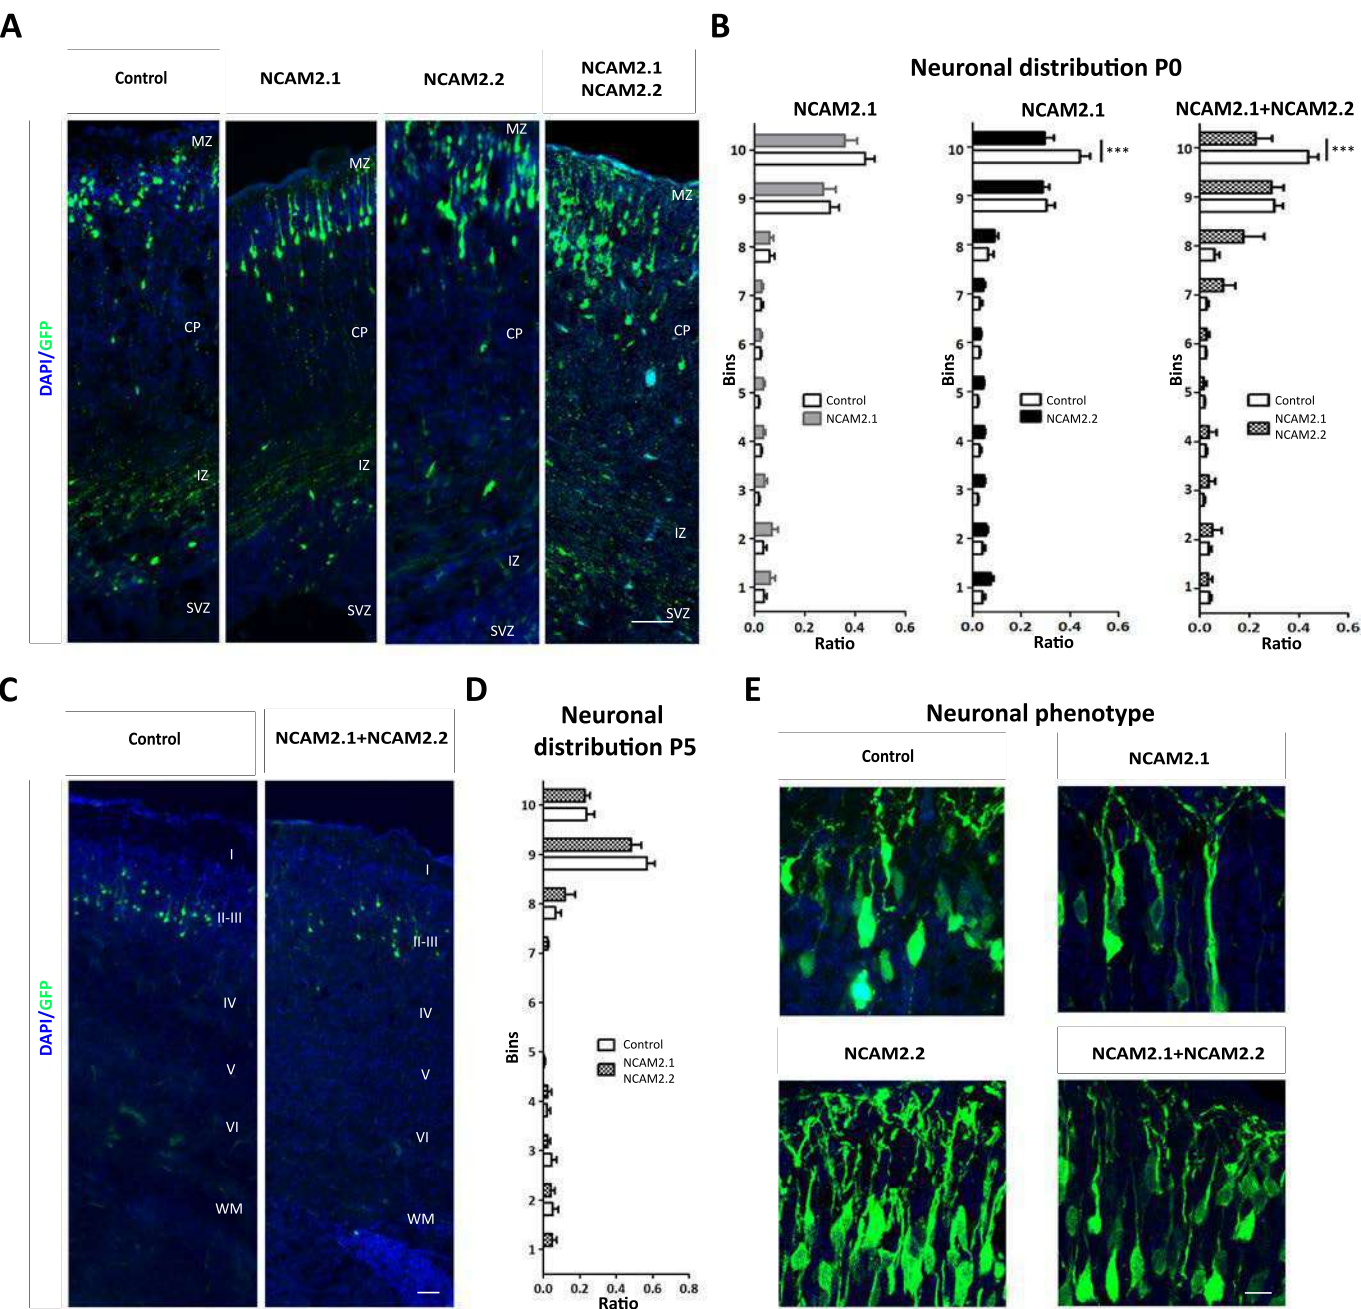

Figure 6

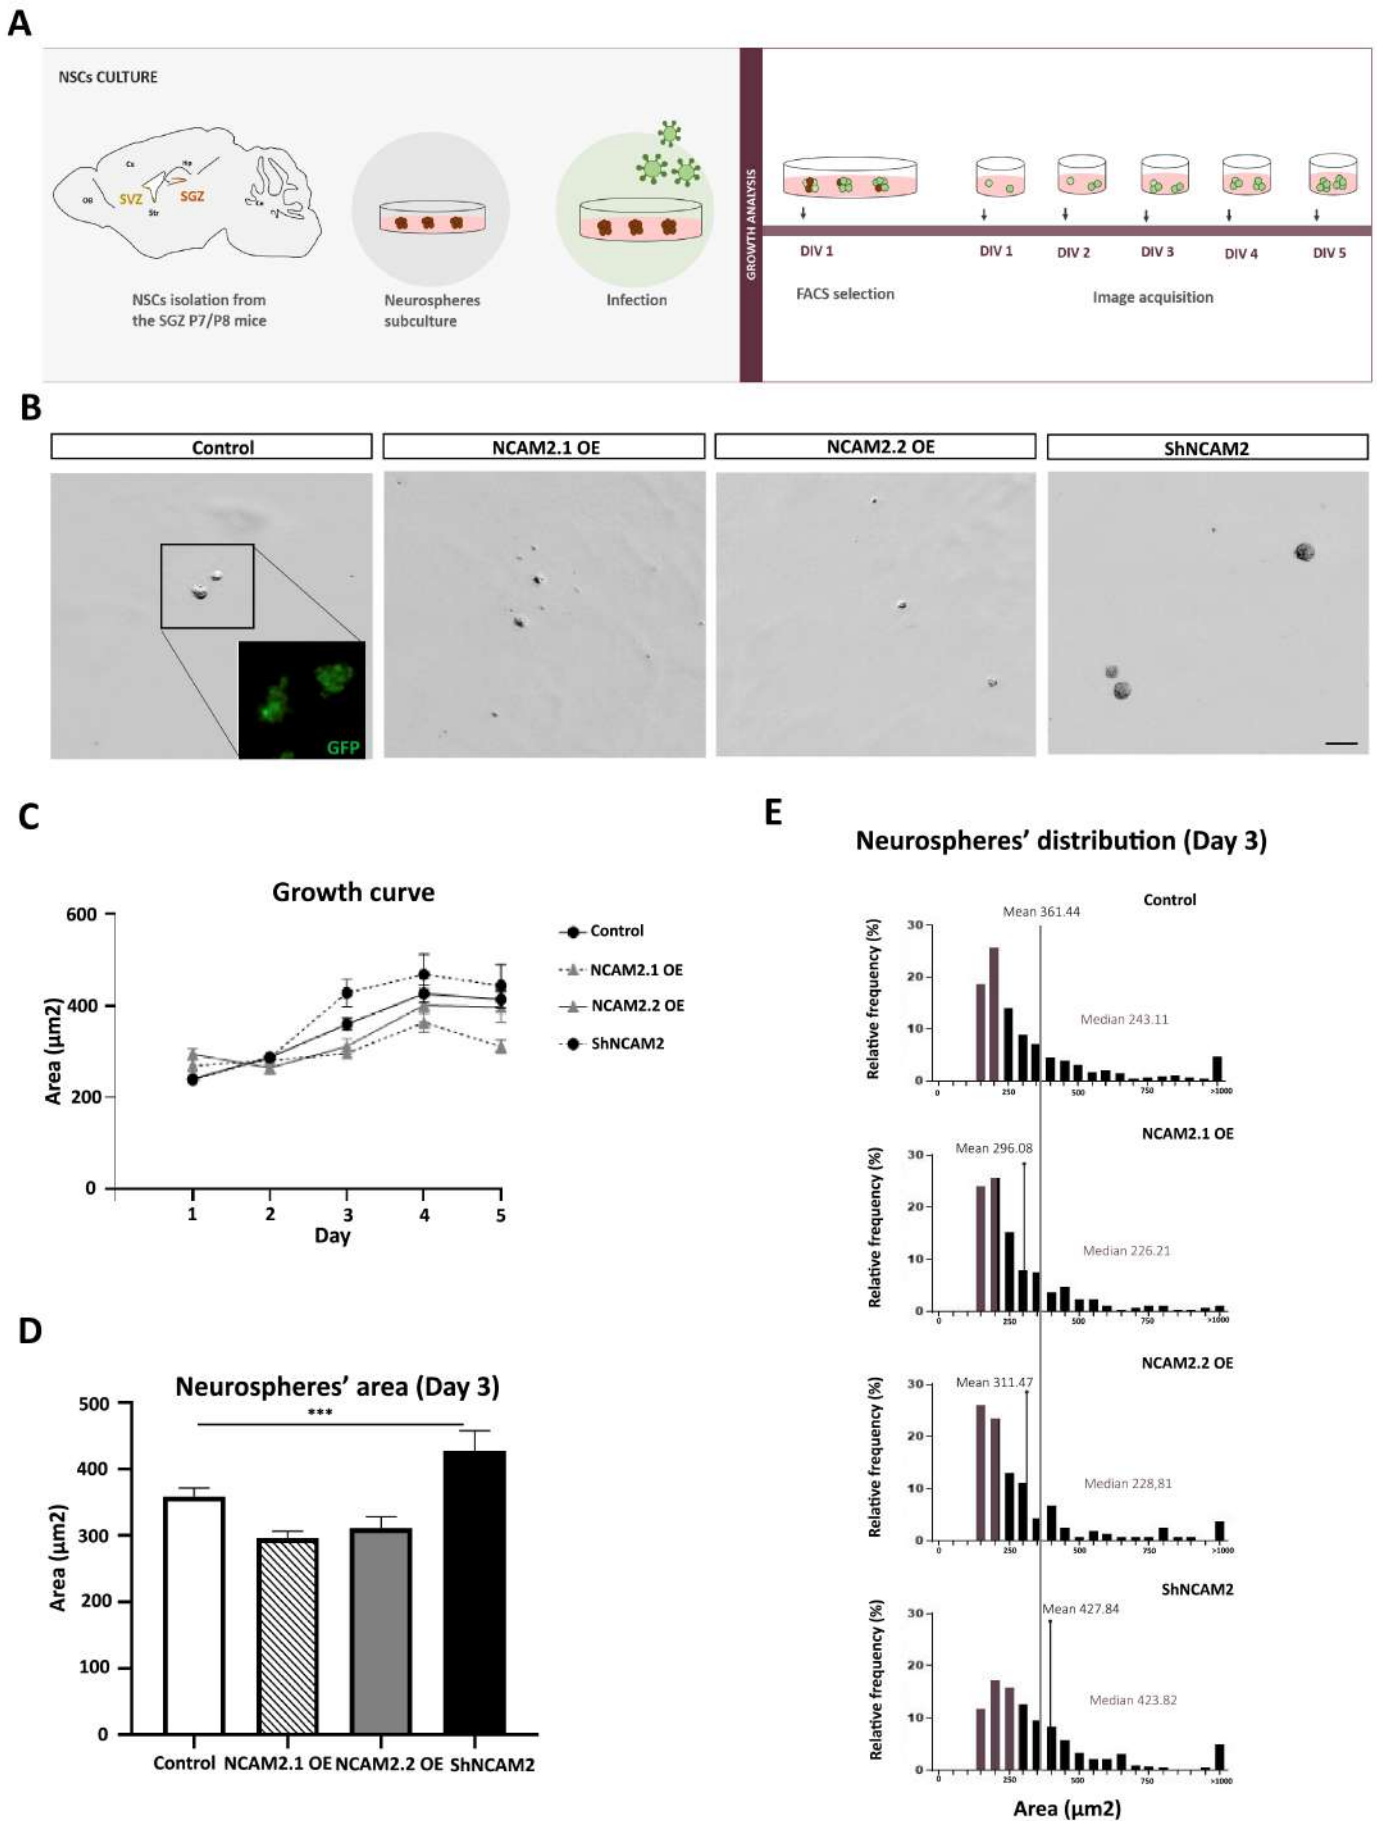

Figure 7



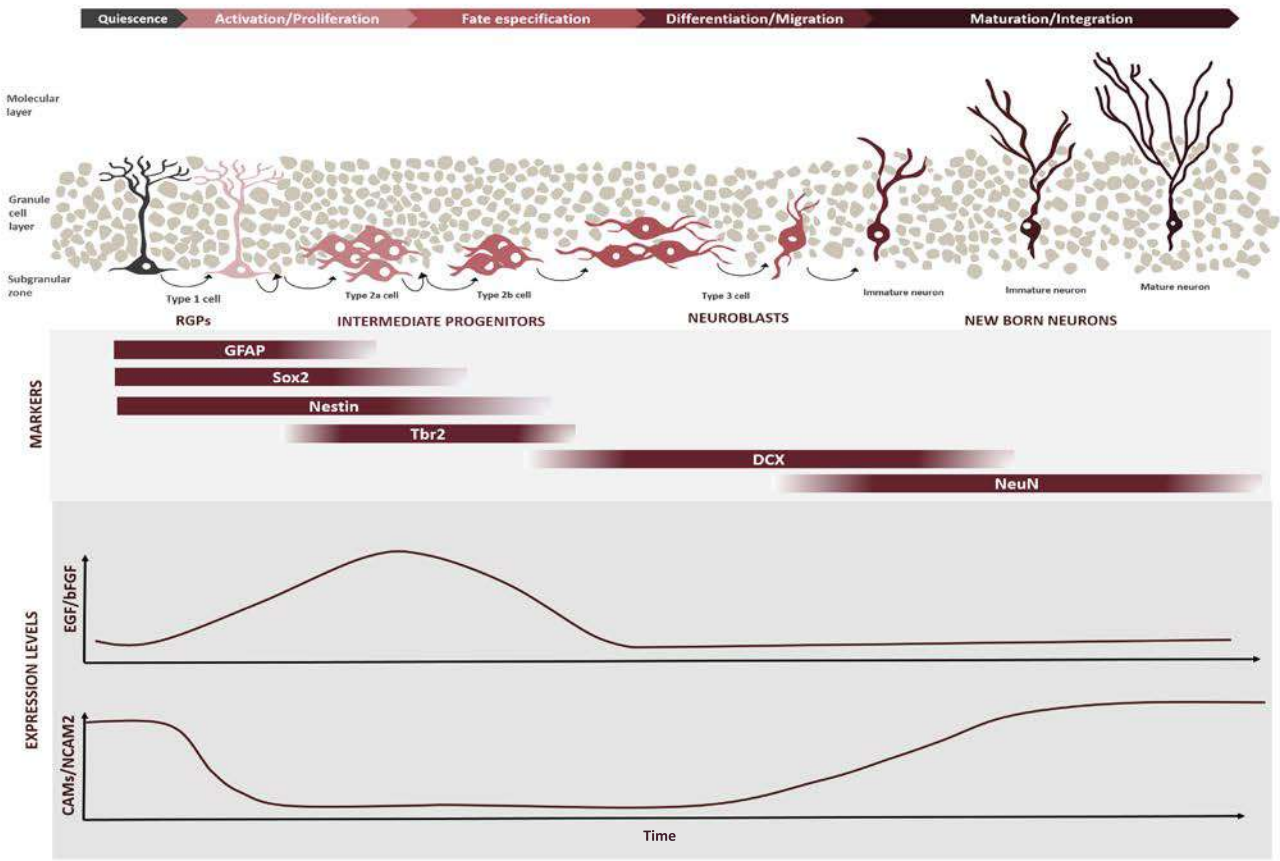

Figure 8
